# Supplementary material for: Fixation of atmospheric carbon dioxide by a cadmium(ii) macrocyclic complex
Source: Royal Society of Chemistry journal article supplement (doi:10.1039/b711187h), 2007-01-01
Supplement: b711187h.pdf [file b711187h.pdf]

## Supporting Experimental Information

### Fixation of Atmospheric Carbon Dioxide by a Cadmium(II) Macrocyclic Complex

Daron E. Janzen, Maikel E. Botros, Donald VanDerveer, Gregory J. Grant

#### Details of X-ray Structural Analyses

##### 1. Details of Structure 1.

##### Data collection and Structural Refinement

A crystal (approximate dimensions 0.12 x 0.12 x 0.12 mm<sup>3</sup>) was placed onto the tip of a 0.1 mm diameter glass capillary, mounted, and X-ray intensity data were measured at 158(2) K using graphite-monochromated radiation (MoK $\alpha$ ,  $\lambda = 0.71073\text{\AA}$ ) on a Rigaku AFC8S diffractometer equipped with a 1 K Mercury CCD detector.<sup>1</sup> The structure was solved using direct methods and refinement was done using full-matrix least-squares techniques (on  $F^2$ ). Data were corrected for absorption, using semi-empirical methods. Structure, solution, refinement and the calculation of derived results were performed with the SHELXTL package of computer programs.<sup>2</sup> Please refer to Table 1A below for additional crystal and refinement information.

The orthorhombic space group  $C222_1$  was determined based on systematic absences and intensity statistics. A direct-methods solution was calculated which provided most non-hydrogen atoms from the E-map. Full-matrix least squares / difference Fourier cycles were performed which located the remaining non-hydrogen atoms. All non-hydrogen atoms were refined with anisotropic displacement parameters. All hydrogen atoms were placed in ideal positions and refined as riding atoms with relative isotropic displacement parameters. The final full matrix least squares refinement converged to  $R1 = 0.0530$  and  $wR2 = 0.1428$  ( $F^2$ , all data).

##### Structure description

The structure consists of one Cd(18N2O4) complex cation with all six donors from the macrocycle coordinated to the Cd(II) center. An ORTEP perspective of the cation is shown in Figure S1A.

Two water molecules are also coordinated to give an eight-coordinate complex in a highly distorted geometry. Two perchlorate anions and one quarter of a non-coordinated water molecule are also present in the asymmetric unit. There is a  $C_2$  axis present. We also would note that a second crystal habit was isolated from the reaction mixture. Solving for Space Group  $P6_3/m$  yielded  $R1 = 0.085$  and  $GooF = 1.13$ . However, there were disorder problems within the 18N2O4 ligand with the conformations of the two ethylene straps between O7 and N10. Nevertheless, the partial structure shows a seven-coordinate environment around the Cd(II) center containing a hexadentate 18N2O4 ligand with a single acetonitrile solvent molecule coordinated. A perspective of the partially refined structure is shown in Figure S2A.

Table 1A. Crystal data and structure refinement for **Compound 1**.

|                                        |                                                              |                     |
|----------------------------------------|--------------------------------------------------------------|---------------------|
| Empirical formula                      | C12 H30.50 Cd Cl2 N2 O14.25                                  |                     |
| Formula weight                         | 614.18                                                       |                     |
| Temperature                            | 158(2) K                                                     |                     |
| Wavelength                             | 0.71073 Å                                                    |                     |
| Crystal system                         | Orthorhombic                                                 |                     |
| Space group                            | $C222_1$                                                     |                     |
| Unit cell dimensions                   | $a = 9.7500(19)$ Å                                           | $\alpha = 90^\circ$ |
|                                        | $b = 20.124(6)$ Å                                            | $\beta = 90^\circ$  |
|                                        | $c = 11.594(2)$ Å                                            | $\gamma = 90^\circ$ |
| Volume                                 | 2274.8(9) Å <sup>3</sup>                                     |                     |
| $Z$                                    | 4                                                            |                     |
| Density (calculated)                   | 1.793 Mg/m <sup>3</sup>                                      |                     |
| Absorption coefficient                 | 1.265 mm <sup>-1</sup>                                       |                     |
| $F(000)$                               | 1250                                                         |                     |
| Crystal color, morphology              | colorless, needle                                            |                     |
| Crystal size                           | 0.12 x 0.12 x 0.12 mm <sup>3</sup>                           |                     |
| Theta range for data collection        | 2.91 to 25.04 °                                              |                     |
| Index ranges                           | $-10 \leq h \leq 11, -23 \leq k \leq 23, -13 \leq l \leq 13$ |                     |
| Reflections collected                  | 9171                                                         |                     |
| Independent reflections                | 2017 [R(int) = 0.0570]                                       |                     |
| Completeness to theta = 25.04°         | 99.5 %                                                       |                     |
| Absorption correction                  | Semi-empirical from equivalents                              |                     |
| Max. and min. transmission             | 0.8630 and 0.8630                                            |                     |
| Refinement method                      | Full-matrix least-squares on $F^2$                           |                     |
| Data / restraints / parameters         | 2017 / 0 / 162                                               |                     |
| Goodness-of-fit on $F^2$               | 1.095                                                        |                     |
| Final $R$ indices [ $I > 2\sigma(I)$ ] | $R1 = 0.0530, wR2 = 0.1346$                                  |                     |
| $R$ indices (all data)                 | $R1 = 0.06597, wR2 = 0.1428$                                 |                     |
| Largest diff. peak and hole            | 1.305 and -0.783 e.Å <sup>-3</sup>                           |                     |

Table 2A. Atomic coordinates ( $\times 10^4$ ) and equivalent isotropic displacement parameters ( $\text{\AA}^2 \times 10^3$ ) for **Compound 1**.  $U_{\text{eq}}$  is defined as one third of the trace of the orthogonalized  $U_{ij}$  tensor.

|       | x        | y        | z        | $U_{\text{eq}}$ |
|-------|----------|----------|----------|-----------------|
| Cd(1) | 5000     | 3418(1)  | 2500     | 34(1)           |
| C(1)  | 5340(11) | 1721(4)  | 3069(8)  | 54(3)           |
| O(2)  | 5009(9)  | 2301(2)  | 3723(4)  | 40(1)           |
| C(3)  | 3718(10) | 2228(5)  | 4322(7)  | 46(2)           |
| C(4)  | 2994(10) | 2883(5)  | 4398(7)  | 44(2)           |
| N(5)  | 2858(7)  | 3182(3)  | 3239(5)  | 36(2)           |
| C(6)  | 1907(9)  | 3749(4)  | 3210(8)  | 46(2)           |
| C(7)  | 2598(9)  | 4385(5)  | 3559(8)  | 46(2)           |
| O(8)  | 3681(6)  | 4476(3)  | 2779(5)  | 43(2)           |
| C(9)  | 4459(10) | 5075(4)  | 2958(9)  | 51(2)           |
| O(1)  | 6023(7)  | 3706(3)  | 4281(5)  | 51(2)           |
| Cl(1) | 0        | 1936(1)  | 2500     | 34(1)           |
| O(9)  | 425(15)  | 2564(6)  | 2066(11) | 59(4)           |
| O(10) | 532(15)  | 1549(5)  | 3391(7)  | 92(6)           |
| O(11) | 1332(14) | 1968(11) | 1982(11) | 118(6)          |
| Cl(2) | 3636(4)  | 0        | 5000     | 97(2)           |
| O(12) | 3750(40) | 286(14)  | 3607(17) | 176(16)         |
| O(13) | 4128(17) | 558(6)   | 5372(13) | 154(6)          |
| O(14) | 2236(14) | 0        | 5000     | 99(4)           |
| O(15) | 5000     | -197(9)  | 2500     | 22(6)           |

Table 3A. Bond lengths [Å] and angles [°] for **Compound 1**.

|                     |           |                     |           |
|---------------------|-----------|---------------------|-----------|
| Cd(1)-N(5)#1        | 2.306(7)  | C(9)-C(9)#1         | 1.497(18) |
| Cd(1)-N(5)          | 2.306(7)  | Cl(1)-O(10)#2       | 1.393(7)  |
| Cd(1)-O(1)#1        | 2.365(6)  | Cl(1)-O(10)         | 1.393(7)  |
| Cd(1)-O(1)          | 2.365(6)  | Cl(1)-O(9)          | 1.422(12) |
| Cd(1)-O(8)#1        | 2.509(5)  | Cl(1)-O(9)#2        | 1.422(12) |
| Cd(1)-O(8)          | 2.509(5)  | Cl(1)-O(11)         | 1.432(13) |
| C(1)-O(2)           | 1.429(10) | Cl(1)-O(11)#2       | 1.432(13) |
| C(1)-C(1)#1         | 1.48(2)   | O(9)-O(9)#2         | 1.30(3)   |
| O(2)-C(3)           | 1.445(12) | O(9)-O(11)          | 1.49(2)   |
| C(3)-C(4)           | 1.499(13) | Cl(2)-O(13)#3       | 1.295(11) |
| C(4)-N(5)           | 1.478(10) | Cl(2)-O(13)         | 1.295(11) |
| N(5)-C(6)           | 1.471(12) | Cl(2)-O(14)         | 1.365(14) |
| C(6)-C(7)           | 1.503(13) | Cl(2)-O(12)         | 1.718(16) |
| C(7)-O(8)           | 1.402(10) | Cl(2)-O(12)#3       | 1.718(16) |
| O(8)-C(9)           | 1.439(10) |                     |           |
| C(9)-C(9)#1         | 1.497(18) |                     |           |
|                     |           |                     |           |
| N(5)#1-Cd(1)-N(5)   | 156.2(3)  | N(5)-Cd(1)-O(2)     | 68.3(2)   |
| N(5)#1-Cd(1)-O(1)#1 | 96.2(2)   | O(1)#1-Cd(1)-O(2)   | 132.4(2)  |
| N(5)-Cd(1)-O(1)#1   | 89.6(2)   | O(1)-Cd(1)-O(2)     | 74.9(2)   |
| N(5)#1-Cd(1)-O(1)   | 89.6(2)   | O(2)#1-Cd(1)-O(2)   | 64.5(2)   |
| N(5)-Cd(1)-O(1)     | 96.2(2)   | O(2)#1-Cd(1)-O(8)   | 141.7(2)  |
| O(1)#1-Cd(1)-O(1)   | 151.7(3)  | O(2)-Cd(1)-O(8)     | 130.6(2)  |
| N(5)#1-Cd(1)-O(8)#1 | 70.3(2)   | O(2)#1-Cd(1)-O(8)#1 | 130.6(2)  |
| N(5)-Cd(1)-O(8)#1   | 133.4(2)  | O(2)-Cd(1)-O(8)#1   | 141.7(2)  |
| O(1)#1-Cd(1)-O(8)#1 | 84.0(2)   | O(2)#1-Cd(1)-N(5)#1 | 68.3(2)   |
| O(1)-Cd(1)-O(8)#1   | 71.9(2)   | O(2)-C(1)-C(1)#1    | 111.9(7)  |
| N(5)#1-Cd(1)-O(8)   | 133.4(2)  | C(1)-O(2)-C(3)      | 111.6(7)  |
| N(5)-Cd(1)-O(8)     | 70.3(2)   | O(2)-C(3)-C(4)      | 110.4(7)  |
| O(1)#1-Cd(1)-O(8)   | 71.9(2)   | N(5)-C(4)-C(3)      | 110.3(7)  |
| O(1)-Cd(1)-O(8)     | 84.0(2)   | C(6)-N(5)-C(4)      | 113.1(7)  |
| O(8)#1-Cd(1)-O(8)   | 63.8(3)   | C(6)-N(5)-Cd(1)     | 113.7(5)  |
| N(5)-Cd(1)-O(2)#1   | 91.2(2)   | C(4)-N(5)-Cd(1)     | 109.9(5)  |

|                       |           |                       |           |
|-----------------------|-----------|-----------------------|-----------|
| O(1)#1-Cd(1)-O(2)#1   | 74.9(2)   | N(5)-C(6)-C(7)        | 111.9(7)  |
| O(1)-Cd(1)-O(2)#1     | 132.4(2)  | O(8)-C(7)-C(6)        | 105.9(6)  |
| N(5)#1-Cd(1)-O(2)     | 91.2(2)   | C(7)-O(8)-C(9)        | 114.4(6)  |
| C(7)-O(8)-Cd(1)       | 111.0(5)  | C(9)-O(8)-Cd(1)       | 117.3(5)  |
| O(8)-C(9)-C(9)#1      | 105.6(6)  | O(10)#2-Cl(1)-O(10)   | 112.1(8)  |
| O(10)#2-Cl(1)-O(9)    | 110.1(6)  | O(10)-Cl(1)-O(9)      | 130.5(7)  |
| O(10)#2-Cl(1)-O(9)#2  | 130.5(7)  | O(10)-Cl(1)-O(9)#2    | 110.1(6)  |
| O(9)-Cl(1)-O(9)#2     | 54.6(12)  | O(10)#2-Cl(1)-O(11)   | 92.9(10)  |
| O(10)-Cl(1)-O(11)     | 89.9(9)   | O(9)-Cl(1)-O(11)      | 63.1(10)  |
| O(9)#2-Cl(1)-O(11)    | 111.9(11) | O(10)#2-Cl(1)-O(11)#2 | 89.9(9)   |
| O(10)-Cl(1)-O(11)#2   | 92.9(10)  | O(9)-Cl(1)-O(11)#2    | 111.9(11) |
| O(9)#2-Cl(1)-O(11)#2  | 63.1(10)  | O(11)-Cl(1)-O(11)#2   | 174.9(18) |
| O(9)#2-O(9)-Cl(1)     | 62.7(6)   | O(9)#2-O(9)-O(11)     | 115.3(9)  |
| Cl(1)-O(9)-O(11)      | 58.8(8)   | Cl(1)-O(11)-O(9)      | 58.1(7)   |
| O(13)#3-Cl(2)-O(13)   | 136.5(16) | O(13)#3-Cl(2)-O(14)   | 111.7(8)  |
| O(13)-Cl(2)-O(14)     | 111.7(8)  | O(13)#3-Cl(2)-O(12)   | 87.3(14)  |
| O(13)-Cl(2)-O(12)     | 90.0(10)  | O(14)-Cl(2)-O(12)     | 93.6(12)  |
| O(13)#3-Cl(2)-O(12)#3 | 90.0(10)  | O(13)-Cl(2)-O(12)#3   | 87.3(14)  |
| O(14)-Cl(2)-O(12)#3   | 93.6(12)  | O(12)-Cl(2)-O(12)#3   | 173(2)    |

---

Symmetry transformations used to generate equivalent atoms:

#1 -x+1,y,-z+1/2 #2 -x,y,-z+1/2 #3 x,-y,-z+1

Table 4A. Anisotropic displacement parameters ( $\text{\AA}^2 \times 10^3$ ) for **Compound 1**.

The anisotropic displacement factor exponent takes the form:  $-2\pi^2[ h^2 a^{*2}U_{11} + \dots + 2 h k a^* b^* U_{12} ]$

|       | U11     | U22     | U33     | U23     | U13     | U12      |
|-------|---------|---------|---------|---------|---------|----------|
| Cd(1) | 31(1)   | 40(1)   | 29(1)   | 0       | 1(1)    | 0        |
| C(1)  | 6       | 4(9)    | 45(4)   | 54(5)   | 3(4)    | 7(4)     |
| O(2)  | 33(2)   | 48(3)   | 39(2)   | 2(2)    | 1(4)    | 1(4)     |
| C(3)  | 50(6)   | 58(5)   | 31(4)   | 11(3)   | -1(4)   | -8(4)    |
| C(4)  | 43(5)   | 59(5)   | 31(4)   | 3(4)    | 7(4)    | -9(4)    |
| N(5)  | 34(4)   | 41(4)   | 32(3)   | 1(3)    | -1(3)   | 0(3)     |
| C(6)  | 28(4)   | 45(5)   | 64(6)   | -6(4)   | 13(4)   | -2(4)    |
| C(7)  | 38(5)   | 49(5)   | 51(5)   | -12(4)  | 18(4)   | 2(4)     |
| O(8)  | 37(3)   | 34(3)   | 57(5)   | -10(2)  | 6(2)    | -2(2)    |
| C(9)  | 45(5)   | 36(4)   | 71(6)   | -12(4)  | 15(4)   | -2(4)    |
| O(1)  | 59(4)   | 54(4)   | 40(3)   | 5(3)    | -15(3)  | -22(3)   |
| Cl(1) | 34(1)   | 38(1)   | 30(1)   | 0       | -3(2)   | 0        |
| O(9)  | 71(12)  | 49(7)   | 58(7)   | 7(5)    | -17(6)  | -32(7)   |
| O(10) | 191(16) | 52(5)   | 33(4)   | -8(4)   | -64(7)  | 60(7)    |
| O(11) | 65(8)   | 212(17) | 77(8)   | -28(10) | 27(6)   | 4(11)    |
| Cl(2) | 4(2)    | 52(2)   | 204(6)  | -51(3)  | 0       | 0        |
| O(12) | 290(40) | 180(20) | 63(11)  | 78(14)  | -73(16) | -160(20) |
| O(13) | 173(13) | 110(9)  | 180(13) | -14(9)  | -39(10) | -83(9)   |
| O(14) | 69(8)   | 102(10) | 127(11) | -33(9)  | 0       | 0        |
| O(15) | 31(14)  | 24(10)  | 10(9)   | 0       | 49(14)  | 0        |

Table 5A. Hydrogen coordinates ( $\times 10^4$ ) and isotropic displacement parameters ( $\text{\AA}^2 \times 10^3$ ) for **Compound 1**.

|       | x    | y    | z    | U(eq) |
|-------|------|------|------|-------|
| H(1A) | 5063 | 1333 | 3491 | 65    |
| H(1B) | 6315 | 1699 | 2962 | 65    |
| H(3A) | 3880 | 2059 | 5084 | 56    |
| H(3B) | 3151 | 1915 | 3919 | 56    |
| H(4A) | 2101 | 2821 | 4729 | 53    |
| H(4B) | 3502 | 3178 | 4890 | 53    |
| H(5)  | 2485 | 2860 | 2771 | 43    |
| H(6A) | 1153 | 3663 | 3721 | 55    |
| H(6B) | 1545 | 3796 | 2444 | 55    |
| H(7A) | 1966 | 4750 | 3518 | 55    |
| H(7B) | 2940 | 4354 | 4334 | 55    |
| H(9A) | 4868 | 5076 | 3711 | 61    |
| H(9B) | 3881 | 5459 | 2886 | 61    |



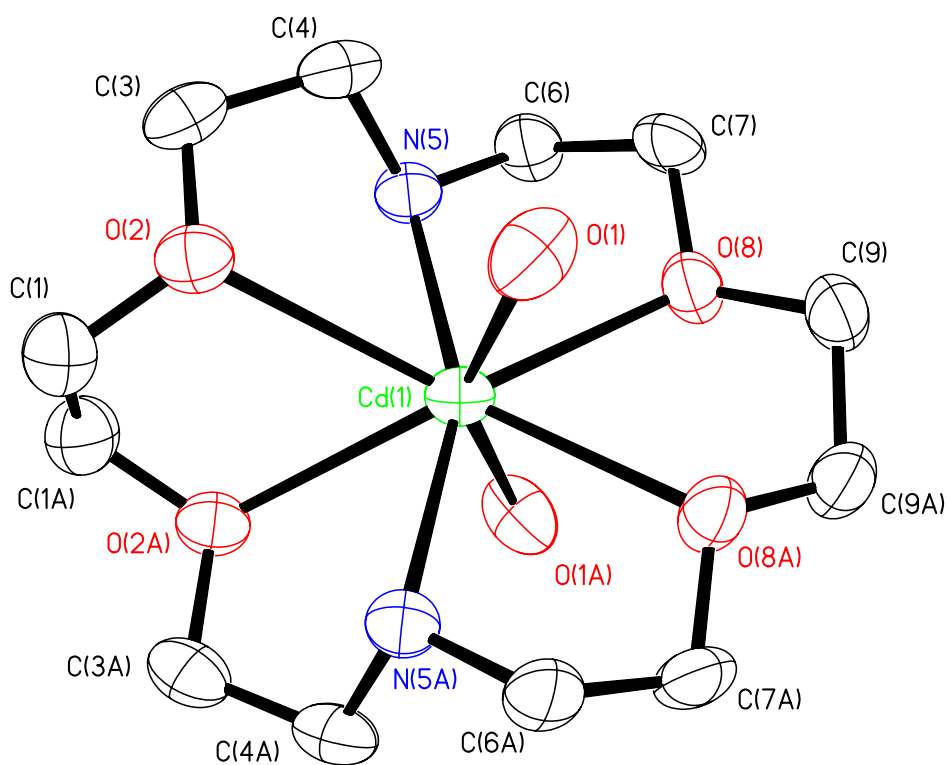

Figure S1A. Thermal ellipsoid perspective of cation in **Compound 1**. 50% Probability.

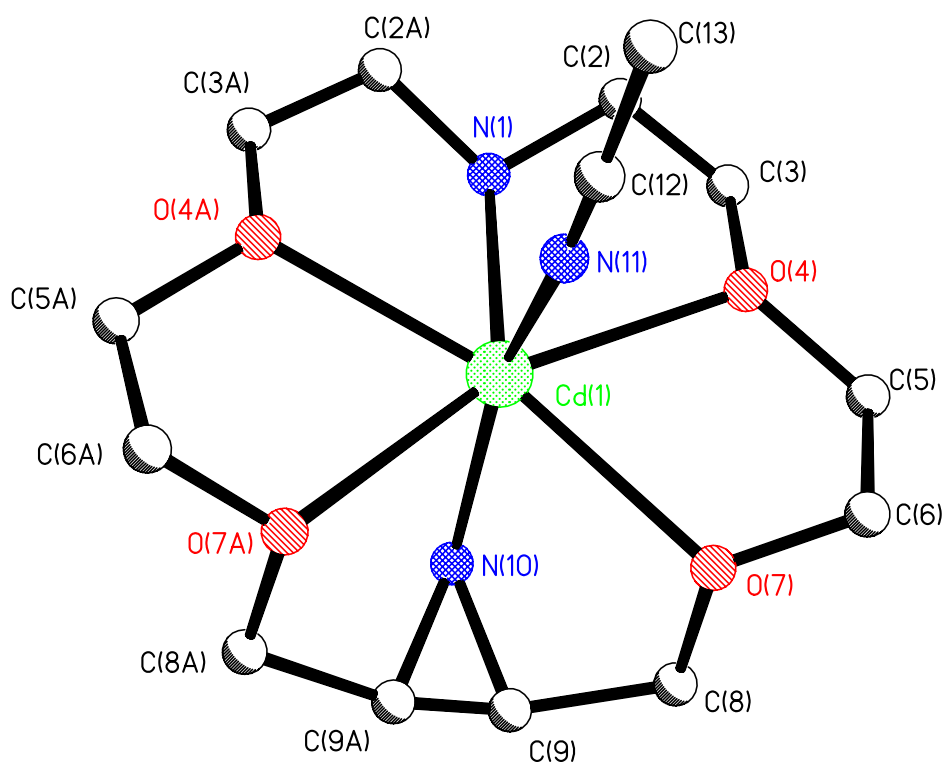

Figure S2A. Partial structure of cation in acetonitrile complex analog of **Compound 1**.

## 2. Details of X-ray Structural Analysis of Compound 2.

### Data collection and Structural Refinement.

A crystal (approximate dimensions 0.55 x 0.24 x 0.06 mm<sup>3</sup>) was placed onto the tip of a 0.1 mm diameter glass capillary, mounted, and X-ray intensity data were measured at 163(2) K using graphite-monochromated radiation (MoK $\alpha$ ,  $\lambda = 0.71073\text{\AA}$ ) on a Rigaku AFC8S diffractometer equipped with a 1 K Mercury CCD detector.<sup>1</sup> A preliminary set of cell constants was calculated from reflections harvested from a few frames. The structure was solved using direct methods and refinement was done using full-matrix least-squares techniques (on  $F^2$ ). Data were corrected for absorption, using semi-empirical methods. Structure, solution, refinement and the calculation of derived results were performed with the SHELXTL package of computer programs.<sup>2</sup> Please refer to Table 1B below for additional crystal and refinement information.

The orthorhombic space group  $P-1$  was determined based on systematic absences and intensity statistics. A direct-methods solution was calculated which provided most non-hydrogen atoms from the E-map. Full-matrix least squares / difference Fourier cycles were performed which located the remaining non-hydrogen atoms. All non-hydrogen atoms were refined with anisotropic displacement parameters. All hydrogen atoms were placed in ideal positions and refined as riding atoms with relative isotropic displacement parameters. The final full matrix least squares refinement converged to  $R1 = 0.0498$  and  $wR2 = 0.1262$  ( $F^2$ , all data).

### Structure description

The structure is not as expected and unusual. The structure consists of 3 unique  $[\text{Cd}(\text{18N2O4})]^{2+}$  complexes triply bridged by a carbonate unit. Four perchlorate anions complete the charge balance ( $3*\text{Cd}^{2+} + \text{CO}_3^{2-} + 4\text{ClO}_4^- = 0$ ). Two acetonitrile solvate molecules and 0.5 water molecules are also present in the asymmetric unit. However unexpectedly, the Cd trimer is triply bridged by a single carbonate ion in  $\mu_3$  fashion. The C-O bond lengths and O-C-O bond angles of the triply bridging carbonate in this structure are very similar to those previously observed here (O13-C37 1.272(6)  $\text{\AA}$ , O14-C37 1.284(5)  $\text{\AA}$ , O15-C37 1.293(5)  $\text{\AA}$ ; O13-C37-O14 120.5(4) $^\circ$ , O13-C37-O15 119.6(4) $^\circ$ , O14-C37-O15 119.9(4)  $^\circ$ ). Additionally, the average C-O bond length in triply bridged carbonate Group 12 complexes is 1.28  $\text{\AA}$  while the average nitrate N-O bond length for the analogous search in the Cambridge Crystallographic Data Base (4 complexes) is 1.25  $\text{\AA}$ .<sup>3</sup> Also, in previous Cd complexes of this type, the trinuclear 4+ cation has crystallographic 3-fold symmetry, whereas in this structure though the geometry at each Cd center is very similar, there is no

crystallographic 3-fold symmetry.<sup>4</sup>

Even though each Cd has one short Cd-O bond, there is also a second longer Cd-O interaction, giving an asymmetric bidentate carbonate coordination at each Cd center. The formal Cd-O bonds are Cd(1)-O(13) 2.176(3)Å, Cd(2)-O(14) 2.173(3) Å, Cd(3)-O(15) 2.173(3) Å. The longer interactions are at Cd1-O15 2.7337(33) Å, Cd2-O13 2.8439(34) Å, Cd3-O14 2.7903(35) Å. These longer interactions are all less than the sum of Cd and O VDW radii (Cd 1.58 + O 1.52 = 3.1Å).<sup>5</sup> There are also some longer and shorter Cd-O bonds to the 18N2O4 ligands. The Cd bonds to the 18N2O4 ligands are as follows: (Cd1-N1 2.341(4) Å, Cd1-N2 2.328(4) Å, Cd1-O1 2.543(4) Å, Cd1-O2 2.607(4) Å, Cd1-O3 2.6947(38) Å, Cd1-O4 2.507(3) Å), (Cd2-N3 2.338(5) Å, Cd2-N4 2.322(4) Å, Cd2-O5 2.521(4) Å, Cd2-O6 2.601(4) Å, Cd2-O7 2.6776(38) Å, Cd2-O8 2.500(4) Å), (Cd3-N5 2.325(4) Å, Cd3-N6 2.336(5) Å, Cd3-O9 2.544(5) Å, Cd3-O10 2.632(5) Å, Cd3-O11 2.597(4) Å, Cd3-O12 2.515(4) Å). Each Cd-O distance is at least the van der Waals radii sum for Cd and O minus 0.4 Å.<sup>5</sup> Thus, each Cd can be described as eight coordinate. Also, at each Cd center, one of the nitrogen donors is almost perfectly trans to the longer Cd-O bond of the carbonate (see figures). The short carbonate Cd-O bond neatly bisects the N-Cd-N angle and has no trans atom coordinated. The 4 oxygen atoms of each 18N2O4 ligand are coordinated in a plane around each Cd center with small mean deviations from least-squares planes (Cd1, O1-O4 0.025, Cd2, O5-O8 0.082, Cd3, O9-O12 0.039). The angles between these least-squares planes are almost 60 (Cd1 plane-Cd2 plane 58.7°, Cd2 plane-Cd3 plane 61.6°, Cd3 plane-Cd1 plane 59.8°). Also, all these least-squares planes are essentially 90° to the Cd carbonate coordinated nitrogens' plane (Cd1,O1-O4 plane-Cd1,N1,N2, O13,O15 plane 88.7°, Cd2,O5-O8 plane-Cd2,N3,N4, O13,O14 plane 88.8°, Cd3,O9-O12 plane-Cd3,N5,N6, O14,O15 plane 88.2°).

As search of the Cambridge Crystallographic Data Base reveals two other related structures with similar 18-membered macrocyclic rings bound to Cd(II). These are [Cd(18N2O4)I<sub>2</sub>] (CDTXZO) and a Cd cluster complex (WOZSOT) which uses a N,N'-bis(phosphonomethyl)-1,10-diaza-18-crown-6 ligand. Both involve 18N2O4 and have 8 coordinate Cd centers.<sup>6,7</sup> The structure [Cd(18N2O4)I<sub>2</sub>] has *trans* iodides with the 6 coordinated atoms of 18N2O4 in a plane (N-Cd-N angle 180°). The structure of WOZSOT incorporates *cis* oxygens of the phosphonomethyl groups but the coordinated nitrogens of 18N2O4 are still roughly *trans* (N-Cd-N angle 152°).

The coordination environment at each Cd center is remarkably similar. A least-squares overlay of atom positions of Cd and coordinated N and O atoms (8 ligated atoms for each Cd) displays this similarity (Cd1-Cd2 RMS difference 0.123, Cd1-Cd3 0.117, Cd2-Cd3 0.087). See figures for more detail. The 18O4N2 conformation is very similar at each Cd center also with the exception

of one set of ethylene straps next to N6 of Cd3. The ethylene strap orientations are slightly different than for Cd1 and Cd2. If the ethylene straps are also included in the calculated RMS differences in the structure overlays, the results show this clearly. The RMS difference in atom positions for Cd and all C, N, and O atoms of 18O4N2 and the coordinated O atoms of carbonate for pair-wise comparisons are Cd2-Cd3 0.404, Cd1-Cd2 0.129, Cd1-Cd3 0.414. For each Cd center, the coordinated nitrogen atoms of the 18N2O4 ligand are in the same plane as for the bidentate carbonate coordination. This makes the nitrogen donors of each 18N2O4 ligand *cis* as seen by the N-Cd-N angles (N2-Cd1-N1 97.47(15)°, N4-Cd2-N3 98.63(19)°, N5-Cd3-N6 98.32(18)°). The mean deviation from a least-squares plane containing the Cd centers, the coordinated N atoms of the 18N2O4 ligands and the triply bridging carbonate is only 0.078 Å (least-squares plane formed by atoms Cd1-Cd3, N1-N6, C37, O13-O15).

The water molecule is disordered over an inversion center at 0.5,0.5,0.5 and is in a region where H-bonding to the perchlorates anions is possible. Refining the structure without the water molecule results in a solvent accessible void of 64 Å<sup>3</sup> and electron density of 6e<sup>-</sup> at this location (0.5,0.5,0.5) (SQUEEZE) and results in poorer refinement statistics. Spatial disorder was modeled for one of the perchlorate anions over two very similar positions with occupancies of 68%/32% for the two sets of atoms C14, O28-O31 and C14', O28'-O31'. The thermal displacement parameters were constrained to be the same for pair-wise atoms C14, C14'; O28, O28'; O29, O29'; O30, O30'; and O31, O31'. A few additional pair-wise constraints were made on the thermal displacement parameters of C18, C19; C28, C29; and C30, C31. The hydrogens of the water molecule were geometrically placed by fixing the O-H distances at 0.85 Å and the H-O-H angle at 113.6° by fixing the H-H distance at 1.39 Å. The ideally placed hydrogens of the methyl groups of the acetonitrile molecules (fixed lengths of 0.98 Å) were allowed to refine the torsion angle with the preceding carbon to best place these hydrogens. Hydrogen atoms of the nitrogens of the 18O4N2 ligand were placed in ideal positions at distances of 0.93 Å. Hydrogen atoms of the carbons of the 18O4N2 ligand were placed in ideal positions at distances of 0.99 Å.

Data collection and structure solution were conducted at the X-Ray Crystallographic Laboratory, Clemson University. All calculations were performed using Pentium computers using the current SHELXTL suite of programs.

Table 1B. Crystal data and structure refinement for **Compound 2**.

|                                                     |                                                              |                            |
|-----------------------------------------------------|--------------------------------------------------------------|----------------------------|
| Empirical formula                                   | C82 H170 Cd6 Cl8 N16 O63                                     |                            |
| Formula weight                                      | 3346.34                                                      |                            |
| Temperature                                         | 163(2) K                                                     |                            |
| Wavelength                                          | 0.71073 Å                                                    |                            |
| Crystal system                                      | Triclinic                                                    |                            |
| Space group                                         | P -1                                                         |                            |
| Unit cell dimensions                                | $a = 12.627(3)$ Å                                            | $\alpha = 92.93(3)^\circ$  |
|                                                     | $b = 13.415(3)$ Å                                            | $\beta = 96.77(3)^\circ$   |
|                                                     | $c = 21.981(4)$ Å                                            | $\gamma = 117.74(3)^\circ$ |
| Volume                                              | 3248.4(16) Å <sup>3</sup>                                    |                            |
| <i>Z</i>                                            | 1                                                            |                            |
| Density (calculated)                                | 1.711 Mg/m <sup>3</sup>                                      |                            |
| Absorption coefficient                              | 1.229 mm <sup>-1</sup>                                       |                            |
| <i>F</i> (000)                                      | 1702                                                         |                            |
| Crystal color, morphology                           | colorless, plate                                             |                            |
| Crystal size                                        | 0.55 x 0.24 x 0.06 mm <sup>3</sup>                           |                            |
| Theta range for data collection                     | 2.56 to 26.02°                                               |                            |
| Index ranges                                        | $-15 \leq h \leq 15, -16 \leq k \leq 16, -23 \leq l \leq 27$ |                            |
| Reflections collected                               | 28278                                                        |                            |
| Independent reflections                             | 12649 [ <i>R</i> (int) = 0.0369]                             |                            |
| Observed reflections                                | 10006                                                        |                            |
| Completeness to theta = 26.02°                      | 98.6%                                                        |                            |
| Absorption correction                               | Semi-empirical from equivalents                              |                            |
| Max. and min. transmission                          | 0.9299 and 0.5514                                            |                            |
| Refinement method                                   | Full-matrix least-squares on <i>F</i> <sup>2</sup>           |                            |
| Data / restraints / parameters                      | 12649 / 13 / 788                                             |                            |
| Goodness-of-fit on <i>F</i> <sup>2</sup>            | 1.063                                                        |                            |
| Final <i>R</i> indices [ <i>I</i> > 2σ( <i>I</i> )] | <i>R</i> 1 = 0.0498, <i>wR</i> 2 = 0.1178                    |                            |
| <i>R</i> indices (all data)                         | <i>R</i> 1 = 0.0693, <i>wR</i> 2 = 0.1262                    |                            |
| Largest diff. peak and hole                         | 1.265 and -0.716 e.Å <sup>-3</sup>                           |                            |

Table 2B. Atomic coordinates ( $\times 10^4$ ) and equivalent isotropic displacement parameters ( $\text{\AA}^2 \times 10^3$ ) for **Compound 2**.  $U_{\text{eq}}$  is defined as one third of the trace of the orthogonalized  $U_{ij}$  tensor.

|     | x       | y        | z       | $U_{\text{eq}}$ |
|-----|---------|----------|---------|-----------------|
| Cd1 | 3344(1) | 10122(1) | 2422(1) | 25(1)           |
| Cd2 | 1020(1) | 6363(1)  | 3187(1) | 28(1)           |
| Cd3 | 4004(1) | 6932(1)  | 1794(1) | 30(1)           |
| O13 | 2391(3) | 8449(3)  | 2720(2) | 28(1)           |
| O15 | 3542(3) | 8229(3)  | 2095(2) | 26(1)           |
| O4  | 5348(3) | 10657(3) | 3066(2) | 31(1)           |
| O8  | 2285(3) | 7564(3)  | 4170(2) | 38(1)           |
| O14 | 2354(3) | 6784(3)  | 2571(2) | 28(1)           |
| O1  | 2467(3) | 9696(3)  | 1279(2) | 38(1)           |
| O12 | 4877(3) | 6657(3)  | 2821(2) | 41(1)           |
| O2  | 1104(3) | 9709(3)  | 2130(2) | 37(1)           |
| O6  | -60(3)  | 4615(3)  | 2346(2) | 50(1)           |
| O7  | 2535(3) | 5723(3)  | 3783(2) | 38(1)           |
| N2  | 3153(4) | 11724(3) | 2695(2) | 30(1)           |
| O5  | -509(4) | 6391(4)  | 2349(2) | 50(1)           |
| O10 | 3854(5) | 7781(4)  | 754(2)  | 60(1)           |
| N1  | 4898(3) | 10970(3) | 1835(2) | 29(1)           |
| O11 | 6125(3) | 8539(4)  | 2304(2) | 50(1)           |
| C34 | 6051(5) | 7426(6)  | 3141(3) | 52(2)           |
| O3  | 3505(3) | 10580(3) | 3648(2) | 34(1)           |
| C10 | 5588(5) | 10931(4) | 3723(2) | 35(1)           |
| N3  | 128(4)  | 7392(4)  | 3578(2) | 40(1)           |
| O9  | 2075(4) | 5790(4)  | 1018(2) | 61(1)           |
| C5  | 1065(5) | 10764(5) | 2168(3) | 44(1)           |
| C8  | 3735(5) | 11718(4) | 3816(3) | 40(1)           |
| C12 | 6007(4) | 10918(5) | 2098(3) | 36(1)           |
| N4  | -3(4)   | 4709(4)  | 3631(3) | 50(1)           |
| N5  | 3193(4) | 5013(4)  | 1904(2) | 41(1)           |
| C7  | 4009(5) | 12382(4) | 3264(3) | 40(1)           |
| C9  | 4394(5) | 10301(4) | 3948(2) | 35(1)           |
| C3  | 1263(5) | 9458(6)  | 1056(3) | 47(2)           |

|     |          |          |         |        |
|-----|----------|----------|---------|--------|
| C11 | 1400(1)  | 8788(1)  | 9105(1) | 38(1)  |
| C37 | 2760(4)  | 7821(4)  | 2466(2) | 24(1)  |
| O19 | 2670(4)  | 9254(5)  | 9298(3) | 71(2)  |
| C11 | 6356(4)  | 11342(5) | 2769(3) | 37(1)  |
| C1  | 4533(5)  | 10457(5) | 1184(3) | 40(1)  |
| N6  | 5495(5)  | 7084(5)  | 1213(3) | 56(2)  |
| C6  | 1898(5)  | 11458(5) | 2740(3) | 41(1)  |
| O18 | 1044(5)  | 9624(4)  | 9243(3) | 79(2)  |
| O17 | 786(5)   | 7866(5)  | 9448(4) | 92(2)  |
| C24 | 976(6)   | 8358(5)  | 4044(3) | 52(2)  |
| C13 | -412(6)  | 7787(6)  | 3065(4) | 55(2)  |
| C4  | 531(5)   | 8993(5)  | 1559(3) | 41(1)  |
| C22 | 3120(5)  | 7332(5)  | 4550(3) | 45(1)  |
| C2  | 3338(5)  | 10366(5) | 912(3)  | 43(1)  |
| C21 | 3537(5)  | 6709(5)  | 4130(3) | 42(1)  |
| C23 | 1661(6)  | 8018(5)  | 4504(3) | 52(2)  |
| Cl2 | 9591(1)  | 1092(1)  | 3771(1) | 47(1)  |
| O23 | 10751(4) | 2056(4)  | 3909(3) | 67(1)  |
| C20 | 1912(5)  | 4821(5)  | 4144(3) | 46(2)  |
| O22 | 9177(5)  | 1052(5)  | 3122(3) | 80(2)  |
| O21 | 8765(6)  | 1183(6)  | 4094(4) | 103(2) |
| C25 | 1916(6)  | 4315(5)  | 1580(4) | 57(2)  |
| O20 | 9711(6)  | 115(5)   | 3831(4) | 98(2)  |
| C19 | 698(6)   | 4720(5)  | 4227(4) | 60(1)  |
| C26 | 1745(7)  | 4606(6)  | 958(4)  | 64(2)  |
| Cl3 | 7210(1)  | 4894(1)  | 3980(1) | 46(1)  |
| C35 | 4508(6)  | 5497(5)  | 2886(3) | 50(2)  |
| O27 | 8391(5)  | 5450(7)  | 4327(3) | 108(3) |
| O26 | 6411(6)  | 4132(6)  | 4303(3) | 129(3) |
| C18 | -355(6)  | 3657(5)  | 3180(4) | 60(1)  |
| C36 | 3260(6)  | 4810(5)  | 2555(3) | 48(2)  |
| C17 | -910(7)  | 3682(6)  | 2577(4) | 66(2)  |
| C15 | -1255(7) | 5447(7)  | 1888(4) | 71(2)  |
| O16 | 1105(7)  | 8458(8)  | 8468(3) | 125(3) |
| C29 | 4553(9)  | 7606(7)  | 329(4)  | 79(2)  |
| C14 | -1218(6) | 6841(6)  | 2577(4) | 59(2)  |



|      |          |          |          |         |
|------|----------|----------|----------|---------|
| O25  | 7187(7)  | 4360(7)  | 3393(3)  | 131(3)  |
| C32  | 7066(6)  | 8508(8)  | 2023(4)  | 72(2)   |
| C33  | 6294(6)  | 8567(6)  | 2969(3)  | 55(2)   |
| C16  | -543(7)  | 4901(7)  | 1771(4)  | 70(2)   |
| C28  | 2620(9)  | 7424(7)  | 530(4)   | 79(2)   |
| C31  | 6616(9)  | 8177(8)  | 1366(5)  | 90(2)   |
| C27  | 1873(9)  | 6183(7)  | 437(4)   | 82(3)   |
| C30  | 4997(9)  | 6780(8)  | 556(5)   | 90(2)   |
| O24  | 7006(10) | 5754(8)  | 3832(5)  | 161(4)  |
| N8   | 6271(5)  | 8993(5)  | 4627(3)  | 60(2)   |
| C38  | 8323(6)  | 8000(6)  | -140(3)  | 51(2)   |
| C41  | 7031(6)  | 8773(6)  | 4700(3)  | 52(2)   |
| C39  | 8295(8)  | 7217(6)  | 262(4)   | 71(2)   |
| C40  | 8005(8)  | 8478(9)  | 4785(4)  | 87(3)   |
| N7   | 8278(13) | 6576(8)  | 578(4)   | 151(5)  |
| O32  | 5720(18) | 5770(19) | 5220(5)  | 197(10) |
| C14  | 5178(7)  | 3901(5)  | 1390(3)  | 39(1)   |
| O28  | 5920(7)  | 3418(7)  | 1277(5)  | 76(3)   |
| O29  | 4170(30) | 3224(17) | 1660(20) | 133(5)  |
| O30  | 5856(9)  | 5044(7)  | 1694(5)  | 61(3)   |
| O31  | 4557(9)  | 3965(9)  | 835(4)   | 103(3)  |
| C14' | 5038(17) | 3718(12) | 1481(8)  | 39(1)   |
| O28' | 5317(17) | 3250(16) | 979(9)   | 76(3)   |
| O29' | 3890(50) | 3090(40) | 1640(50) | 133(5)  |
| O30' | 5470(20) | 4901(15) | 1481(12) | 61(3)   |
| O31' | 5610(20) | 3529(18) | 2014(8)  | 103(3)  |

---

Table 3B. Bond lengths [Å] and angles [°] for **Compound 2**.

---

|             |          |              |           |
|-------------|----------|--------------|-----------|
| Cd(1)-O(13) | 2.176(3) | O(7)-C(21)   | 1.429(7)  |
| Cd(1)-N(2)  | 2.328(4) | O(7)-C(20)   | 1.439(6)  |
| Cd(1)-N(1)  | 2.341(4) | N(2)-C(6)    | 1.470(7)  |
| Cd(1)-O(4)  | 2.507(3) | N(2)-C(7)    | 1.480(7)  |
| Cd(1)-O(1)  | 2.543(4) | N(2)-H(2C)   | 0.9300    |
| Cd(1)-O(2)  | 2.607(4) | O(5)-C(14)   | 1.412(8)  |
| Cd(2)-O(14) | 2.173(3) | O(5)-C(15)   | 1.432(9)  |
| Cd(2)-N(4)  | 2.322(4) | O(10)-C(28)  | 1.415(10) |
| Cd(2)-N(3)  | 2.338(5) | O(10)-C(29)  | 1.439(10) |
| Cd(2)-O(8)  | 2.500(4) | N(1)-C(1)    | 1.477(7)  |
| Cd(2)-O(5)  | 2.521(4) | N(1)-C(12)   | 1.485(6)  |
| Cd(2)-O(6)  | 2.601(4) | N(1)-H(1C)   | 0.9300    |
| Cd(3)-O(15) | 2.173(3) | O(11)-C(32)  | 1.418(8)  |
| Cd(3)-N(5)  | 2.325(4) | O(11)-C(33)  | 1.448(8)  |
| Cd(3)-N(6)  | 2.336(5) | C(34)-C(33)  | 1.493(10) |
| Cd(3)-O(12) | 2.515(4) | C(34)-H(34A) | 0.9900    |
| Cd(3)-O(9)  | 2.544(5) | C(34)-H(34B) | 0.9900    |
| Cd(3)-O(11) | 2.597(4) | O(3)-C(8)    | 1.434(6)  |
| Cd(3)-O(10) | 2.632(5) | O(3)-C(9)    | 1.442(6)  |
| O(13)-C(37) | 1.272(6) | C(10)-C(9)   | 1.504(7)  |
| O(15)-C(37) | 1.293(5) | C(10)-H(10A) | 0.9900    |
| O(4)-C(10)  | 1.431(6) | C(10)-H(10B) | 0.9900    |
| O(4)-C(11)  | 1.435(6) | N(3)-C(24)   | 1.479(8)  |
| O(8)-C(22)  | 1.425(7) | N(3)-C(13)   | 1.495(8)  |
| O(8)-C(23)  | 1.437(7) | N(3)-H(3C)   | 0.9300    |
| O(14)-C(37) | 1.284(5) | O(9)-C(26)   | 1.435(8)  |
| O(1)-C(3)   | 1.418(6) | O(9)-C(27)   | 1.445(9)  |
| O(1)-C(2)   | 1.427(6) | C(5)-C(6)    | 1.487(9)  |
| O(12)-C(34) | 1.419(7) | C(5)-H(5A)   | 0.9900    |
| O(12)-C(35) | 1.422(7) | C(5)-H(5B)   | 0.9900    |
| O(2)-C(4)   | 1.427(7) | C(8)-C(7)    | 1.519(8)  |
| O(2)-C(5)   | 1.437(7) | C(8)-H(8A)   | 0.9900    |
| O(6)-C(17)  | 1.386(8) | C(8)-H(8B)   | 0.9900    |
| O(6)-C(16)  | 1.484(9) | C(12)-C(11)  | 1.491(8)  |

|              |           |              |           |
|--------------|-----------|--------------|-----------|
| C(12)-H(12A) | 0.9900    | C(4)-H(4B)   | 0.9900    |
| C(12)-H(12B) | 0.9900    | C(22)-C(21)  | 1.508(9)  |
| N(4)-C(19)   | 1.487(8)  | C(22)-H(22A) | 0.9900    |
| N(4)-C(18)   | 1.531(9)  | C(22)-H(22B) | 0.9900    |
| N(4)-H(4C)   | 0.9300    | C(2)-H(2A)   | 0.9900    |
| N(5)-C(36)   | 1.471(8)  | C(2)-H(2B)   | 0.9900    |
| N(5)-C(25)   | 1.496(8)  | C(21)-H(21A) | 0.9900    |
| N(5)-H(5C)   | 0.9300    | C(21)-H(21B) | 0.9900    |
| C(7)-H(7A)   | 0.9900    | C(23)-H(23A) | 0.9900    |
| C(7)-H(7B)   | 0.9900    | C(23)-H(23B) | 0.9900    |
| C(9)-H(9A)   | 0.9900    | Cl(2)-O(21)  | 1.375(6)  |
| C(9)-H(9B)   | 0.9900    | Cl(2)-O(20)  | 1.399(5)  |
| C(3)-C(4)    | 1.498(9)  | Cl(2)-O(23)  | 1.415(5)  |
| C(3)-H(3A)   | 0.9900    | Cl(2)-O(22)  | 1.450(6)  |
| C(3)-H(3B)   | 0.9900    | C(20)-C(19)  | 1.509(10) |
| Cl(1)-O(16)  | 1.398(6)  | C(20)-H(20A) | 0.9900    |
| Cl(1)-O(18)  | 1.421(5)  | C(20)-H(20B) | 0.9900    |
| Cl(1)-O(19)  | 1.422(5)  | C(25)-C(26)  | 1.459(11) |
| Cl(1)-O(17)  | 1.427(5)  | C(25)-H(25A) | 0.9900    |
| C(11)-H(11A) | 0.9900    | C(25)-H(25B) | 0.9900    |
| C(11)-H(11B) | 0.9900    | C(19)-H(19A) | 0.9900    |
| C(1)-C(2)    | 1.502(8)  | C(19)-H(19B) | 0.9900    |
| C(1)-H(1A)   | 0.9900    | C(26)-H(26A) | 0.9900    |
| C(1)-H(1B)   | 0.9900    | C(26)-H(26B) | 0.9900    |
| N(6)-C(30)   | 1.459(12) | Cl(3)-O(24)  | 1.342(7)  |
| N(6)-C(31)   | 1.473(11) | Cl(3)-O(26)  | 1.361(6)  |
| N(6)-H(6C)   | 0.9300    | Cl(3)-O(27)  | 1.414(5)  |
| C(6)-H(6A)   | 0.9900    | Cl(3)-O(25)  | 1.432(7)  |
| C(6)-H(6B)   | 0.9900    | C(35)-C(36)  | 1.473(9)  |
| C(24)-C(23)  | 1.478(10) | C(35)-H(35A) | 0.9900    |
| C(24)-H(24A) | 0.9900    | C(35)-H(35B) | 0.9900    |
| C(24)-H(24B) | 0.9900    | C(18)-C(17)  | 1.433(10) |
| C(13)-C(14)  | 1.483(11) | C(18)-H(18A) | 0.9900    |
| C(13)-H(13A) | 0.9900    | C(18)-H(18B) | 0.9900    |
| C(13)-H(13B) | 0.9900    | C(36)-H(36A) | 0.9900    |
| C(4)-H(4A)   | 0.9900    | C(36)-H(36B) | 0.9900    |

|              |           |               |           |
|--------------|-----------|---------------|-----------|
| C(17)-H(17A) | 0.9900    | C(27)-H(27B)  | 0.9900    |
| C(17)-H(17B) | 0.9900    | C(30)-H(30A)  | 0.9900    |
| C(15)-C(16)  | 1.435(12) | C(30)-H(30B)  | 0.9900    |
| C(15)-H(15A) | 0.9900    | N(8)-C(41)    | 1.126(9)  |
| C(15)-H(15B) | 0.9900    | C(38)-C(39)   | 1.397(10) |
| C(29)-C(30)  | 1.537(12) | C(38)-H(38C)  | 0.9800    |
| C(29)-H(29A) | 0.9900    | C(38)-H(38B)  | 0.9800    |
| C(29)-H(29B) | 0.9900    | C(38)-H(38A)  | 0.9800    |
| C(14)-H(14A) | 0.9900    | C(41)-C(40)   | 1.453(11) |
| C(14)-H(14B) | 0.9900    | C(39)-N(7)    | 1.128(11) |
| C(32)-C(31)  | 1.452(13) | C(40)-H(40C)  | 0.9800    |
| C(32)-H(32A) | 0.9900    | C(40)-H(40B)  | 0.9800    |
| C(32)-H(32B) | 0.9900    | C(40)-H(40A)  | 0.9800    |
| C(33)-H(33A) | 0.9900    | O(32)-H(32E)  | 0.8527    |
| C(33)-H(33B) | 0.9900    | O(32)-H(32F)  | 0.8554    |
| C(16)-H(16A) | 0.9900    | Cl(4)-O(29)   | 1.396(10) |
| C(16)-H(16B) | 0.9900    | Cl(4)-O(31)   | 1.399(12) |
| C(28)-C(27)  | 1.470(11) | Cl(4)-O(28)   | 1.402(9)  |
| C(28)-H(28A) | 0.9900    | Cl(4)-O(30)   | 1.438(8)  |
| C(28)-H(28B) | 0.9900    | Cl(4')-O(29') | 1.399(16) |
| C(31)-H(31A) | 0.9900    | Cl(4')-O(28') | 1.400(15) |
| C(31)-H(31B) | 0.9900    | Cl(4')-O(31') | 1.40(2)   |
| C(27)-H(27A) | 0.9900    | Cl(4')-O(30') | 1.418(14) |

|                   |            |                   |            |
|-------------------|------------|-------------------|------------|
| O(13)-Cd(1)-N(2)  | 127.50(14) | O(15)-Cd(3)-O(9)  | 95.61(15)  |
| O(13)-Cd(1)-N(1)  | 134.88(14) | N(5)-Cd(3)-O(9)   | 69.85(17)  |
| N(2)-Cd(1)-N(1)   | 97.47(15)  | N(6)-Cd(3)-O(9)   | 101.8(2)   |
| O(13)-Cd(1)-O(4)  | 95.68(12)  | O(12)-Cd(3)-O(9)  | 135.82(14) |
| N(2)-Cd(1)-O(4)   | 99.72(14)  | O(15)-Cd(3)-O(11) | 79.38(13)  |
| N(1)-Cd(1)-O(4)   | 70.29(13)  | N(5)-Cd(3)-O(11)  | 126.67(16) |
| O(13)-Cd(1)-O(1)  | 100.87(13) | N(6)-Cd(3)-O(11)  | 68.84(19)  |
| N(2)-Cd(1)-O(1)   | 100.98(14) | O(12)-Cd(3)-O(11) | 63.13(14)  |
| N(1)-Cd(1)-O(1)   | 69.88(13)  | O(9)-Cd(3)-O(11)  | 161.03(15) |
| O(4)-Cd(1)-O(1)   | 136.94(12) | O(15)-Cd(3)-O(10) | 79.29(14)  |
| O(13)-Cd(1)-O(2)  | 79.46(12)  | N(5)-Cd(3)-O(10)  | 125.57(17) |
| N(2)-Cd(1)-O(2)   | 69.33(13)  | N(6)-Cd(3)-O(10)  | 67.06(19)  |
| N(1)-Cd(1)-O(2)   | 126.50(13) | O(12)-Cd(3)-O(10) | 160.40(15) |
| O(4)-Cd(1)-O(2)   | 159.94(12) | O(9)-Cd(3)-O(10)  | 63.39(16)  |
| O(1)-Cd(1)-O(2)   | 63.00(12)  | O(11)-Cd(3)-O(10) | 97.65(16)  |
| O(14)-Cd(2)-N(4)  | 130.11(17) | C(37)-O(13)-Cd(1) | 107.4(3)   |
| O(14)-Cd(2)-N(3)  | 131.24(14) | C(37)-O(15)-Cd(3) | 108.5(3)   |
| N(4)-Cd(2)-N(3)   | 98.63(19)  | C(10)-O(4)-C(11)  | 113.4(4)   |
| O(14)-Cd(2)-O(8)  | 102.03(13) | C(10)-O(4)-Cd(1)  | 123.5(3)   |
| N(4)-Cd(2)-O(8)   | 95.93(17)  | C(11)-O(4)-Cd(1)  | 112.6(3)   |
| N(3)-Cd(2)-O(8)   | 69.95(15)  | C(22)-O(8)-C(23)  | 114.4(5)   |
| O(14)-Cd(2)-O(5)  | 91.54(14)  | C(22)-O(8)-Cd(2)  | 123.5(3)   |
| N(4)-Cd(2)-O(5)   | 106.16(16) | C(23)-O(8)-Cd(2)  | 112.6(3)   |
| N(3)-Cd(2)-O(5)   | 70.37(17)  | C(37)-O(14)-Cd(2) | 110.3(3)   |
| O(8)-Cd(2)-O(5)   | 136.83(14) | C(3)-O(1)-C(2)    | 114.3(4)   |
| O(14)-Cd(2)-O(6)  | 78.56(13)  | C(3)-O(1)-Cd(1)   | 123.0(3)   |
| N(4)-Cd(2)-O(6)   | 69.43(18)  | C(2)-O(1)-Cd(1)   | 112.1(3)   |
| N(3)-Cd(2)-O(6)   | 125.37(15) | C(34)-O(12)-C(35) | 114.5(5)   |
| O(8)-Cd(2)-O(6)   | 159.22(13) | C(34)-O(12)-Cd(3) | 123.6(4)   |
| O(5)-Cd(2)-O(6)   | 63.43(14)  | C(35)-O(12)-Cd(3) | 112.9(3)   |
| O(15)-Cd(3)-N(5)  | 132.76(15) | C(4)-O(2)-C(5)    | 115.4(4)   |
| O(15)-Cd(3)-N(6)  | 128.89(16) | C(4)-O(2)-Cd(1)   | 112.0(3)   |
| N(5)-Cd(3)-N(6)   | 98.32(18)  | C(5)-O(2)-Cd(1)   | 109.1(3)   |
| O(15)-Cd(3)-O(12) | 99.54(13)  | C(17)-O(6)-C(16)  | 114.3(5)   |
| N(5)-Cd(3)-O(12)  | 69.42(16)  | C(17)-O(6)-Cd(2)  | 110.9(4)   |
| N(6)-Cd(3)-O(12)  | 100.29(18) | C(16)-O(6)-Cd(2)  | 111.2(4)   |

|                     |          |                     |          |
|---------------------|----------|---------------------|----------|
| C(21)-O(7)-C(20)    | 114.4(4) | C(24)-N(3)-Cd(2)    | 113.0(3) |
| C(6)-N(2)-C(7)      | 112.6(4) | C(13)-N(3)-Cd(2)    | 110.4(4) |
| C(6)-N(2)-Cd(1)     | 112.9(3) | C(24)-N(3)-H(3C)    | 107.5    |
| C(7)-N(2)-Cd(1)     | 110.4(3) | C(13)-N(3)-H(3C)    | 107.5    |
| C(6)-N(2)-H(2C)     | 106.8    | Cd(2)-N(3)-H(3C)    | 107.5    |
| C(7)-N(2)-H(2C)     | 106.8    | C(26)-O(9)-C(27)    | 113.2(6) |
| Cd(1)-N(2)-H(2C)    | 106.8    | C(26)-O(9)-Cd(3)    | 110.9(4) |
| C(14)-O(5)-C(15)    | 109.6(6) | C(27)-O(9)-Cd(3)    | 121.7(5) |
| C(14)-O(5)-Cd(2)    | 112.5(4) | O(2)-C(5)-C(6)      | 106.3(4) |
| C(15)-O(5)-Cd(2)    | 122.9(4) | O(2)-C(5)-H(5A)     | 110.5    |
| C(28)-O(10)-C(29)   | 117.1(6) | C(6)-C(5)-H(5A)     | 110.5    |
| C(28)-O(10)-Cd(3)   | 108.8(4) | O(2)-C(5)-H(5B)     | 110.5    |
| C(29)-O(10)-Cd(3)   | 112.6(4) | C(6)-C(5)-H(5B)     | 110.5    |
| C(1)-N(1)-C(12)     | 108.8(4) | H(5A)-C(5)-H(5B)    | 108.7    |
| C(1)-N(1)-Cd(1)     | 112.6(3) | O(3)-C(8)-C(7)      | 110.1(4) |
| C(12)-N(1)-Cd(1)    | 111.7(3) | O(3)-C(8)-H(8A)     | 109.6    |
| C(1)-N(1)-H(1C)     | 107.8    | C(7)-C(8)-H(8A)     | 109.6    |
| C(12)-N(1)-H(1C)    | 107.8    | O(3)-C(8)-H(8B)     | 109.6    |
| Cd(1)-N(1)-H(1C)    | 107.8    | C(7)-C(8)-H(8B)     | 109.6    |
| C(32)-O(11)-C(33)   | 114.6(5) | H(8A)-C(8)-H(8B)    | 108.2    |
| C(32)-O(11)-Cd(3)   | 111.8(5) | N(1)-C(12)-C(11)    | 110.9(4) |
| C(33)-O(11)-Cd(3)   | 111.5(3) | N(1)-C(12)-H(12A)   | 109.5    |
| O(12)-C(34)-C(33)   | 105.6(5) | C(11)-C(12)-H(12A)  | 109.5    |
| O(12)-C(34)-H(34A)  | 110.6    | N(1)-C(12)-H(12B)   | 109.5    |
| C(33)-C(34)-H(34A)  | 110.6    | C(11)-C(12)-H(12B)  | 109.5    |
| O(12)-C(34)-H(34B)  | 110.6    | H(12A)-C(12)-H(12B) | 108.1    |
| C(33)-C(34)-H(34B)  | 110.6    | C(19)-N(4)-C(18)    | 112.3(5) |
| H(34A)-C(34)-H(34B) | 108.7    | C(19)-N(4)-Cd(2)    | 111.6(3) |
| C(8)-O(3)-C(9)      | 114.7(4) | C(18)-N(4)-Cd(2)    | 111.2(4) |
| O(4)-C(10)-C(9)     | 106.6(4) | C(19)-N(4)-H(4C)    | 107.1    |
| O(4)-C(10)-H(10A)   | 110.4    | C(18)-N(4)-H(4C)    | 107.1    |
| C(9)-C(10)-H(10A)   | 110.4    | Cd(2)-N(4)-H(4C)    | 107.1    |
| O(4)-C(10)-H(10B)   | 110.4    | C(36)-N(5)-C(25)    | 109.4(5) |
| C(9)-C(10)-H(10B)   | 110.4    | C(36)-N(5)-Cd(3)    | 112.2(3) |
| H(10A)-C(10)-H(10B) | 108.6    | C(25)-N(5)-Cd(3)    | 113.5(4) |
| C(24)-N(3)-C(13)    | 110.7(5) | C(36)-N(5)-H(5C)    | 107.1    |

|                     |          |                     |          |
|---------------------|----------|---------------------|----------|
| C(25)-N(5)-H(5C)    | 107.1    | N(1)-C(1)-H(1A)     | 109.4    |
| Cd(3)-N(5)-H(5C)    | 107.1    | C(2)-C(1)-H(1A)     | 109.4    |
| N(2)-C(7)-C(8)      | 112.0(4) | N(1)-C(1)-H(1B)     | 109.4    |
| N(2)-C(7)-H(7A)     | 109.2    | C(2)-C(1)-H(1B)     | 109.4    |
| C(8)-C(7)-H(7A)     | 109.2    | H(1A)-C(1)-H(1B)    | 108.0    |
| N(2)-C(7)-H(7B)     | 109.2    | C(30)-N(6)-C(31)    | 114.6(7) |
| C(8)-C(7)-H(7B)     | 109.2    | C(30)-N(6)-Cd(3)    | 110.8(5) |
| H(7A)-C(7)-H(7B)    | 107.9    | C(31)-N(6)-Cd(3)    | 113.0(5) |
| O(3)-C(9)-C(10)     | 111.1(4) | C(30)-N(6)-H(6C)    | 105.9    |
| O(3)-C(9)-H(9A)     | 109.4    | C(31)-N(6)-H(6C)    | 105.9    |
| C(10)-C(9)-H(9A)    | 109.4    | Cd(3)-N(6)-H(6C)    | 105.9    |
| O(3)-C(9)-H(9B)     | 109.4    | N(2)-C(6)-C(5)      | 110.8(5) |
| C(10)-C(9)-H(9B)    | 109.4    | N(2)-C(6)-H(6A)     | 109.5    |
| H(9A)-C(9)-H(9B)    | 108.0    | C(5)-C(6)-H(6A)     | 109.5    |
| O(1)-C(3)-C(4)      | 107.2(4) | N(2)-C(6)-H(6B)     | 109.5    |
| O(1)-C(3)-H(3A)     | 110.3    | C(5)-C(6)-H(6B)     | 109.5    |
| C(4)-C(3)-H(3A)     | 110.3    | H(6A)-C(6)-H(6B)    | 108.1    |
| O(1)-C(3)-H(3B)     | 110.3    | C(23)-C(24)-N(3)    | 111.5(5) |
| C(4)-C(3)-H(3B)     | 110.3    | C(23)-C(24)-H(24A)  | 109.3    |
| H(3A)-C(3)-H(3B)    | 108.5    | N(3)-C(24)-H(24A)   | 109.3    |
| O(16)-Cl(1)-O(18)   | 108.3(4) | C(23)-C(24)-H(24B)  | 109.3    |
| O(16)-Cl(1)-O(19)   | 110.4(4) | N(3)-C(24)-H(24B)   | 109.3    |
| O(18)-Cl(1)-O(19)   | 109.3(4) | H(24A)-C(24)-H(24B) | 108.0    |
| O(16)-Cl(1)-O(17)   | 112.3(5) | C(14)-C(13)-N(3)    | 111.6(5) |
| O(18)-Cl(1)-O(17)   | 107.9(4) | C(14)-C(13)-H(13A)  | 109.3    |
| O(19)-Cl(1)-O(17)   | 108.6(3) | N(3)-C(13)-H(13A)   | 109.3    |
| O(13)-C(37)-O(14)   | 120.5(4) | C(14)-C(13)-H(13B)  | 109.3    |
| O(13)-C(37)-O(15)   | 119.6(4) | N(3)-C(13)-H(13B)   | 109.3    |
| O(14)-C(37)-O(15)   | 119.9(4) | H(13A)-C(13)-H(13B) | 108.0    |
| O(4)-C(11)-C(12)    | 107.6(4) | O(2)-C(4)-C(3)      | 111.2(5) |
| O(4)-C(11)-H(11A)   | 110.2    | O(2)-C(4)-H(4A)     | 109.4    |
| C(12)-C(11)-H(11A)  | 110.2    | C(3)-C(4)-H(4A)     | 109.4    |
| O(4)-C(11)-H(11B)   | 110.2    | O(2)-C(4)-H(4B)     | 109.4    |
| C(12)-C(11)-H(11B)  | 110.2    | C(3)-C(4)-H(4B)     | 109.4    |
| H(11A)-C(11)-H(11B) | 108.5    | H(4A)-C(4)-H(4B)    | 108.0    |
| N(1)-C(1)-C(2)      | 111.4(5) | O(8)-C(22)-C(21)    | 106.6(5) |

|                     |          |                     |          |
|---------------------|----------|---------------------|----------|
| O(8)-C(22)-H(22A)   | 110.4    | C(26)-C(25)-H(25A)  | 109.2    |
| C(21)-C(22)-H(22A)  | 110.4    | N(5)-C(25)-H(25A)   | 109.2    |
| O(8)-C(22)-H(22B)   | 110.4    | C(26)-C(25)-H(25B)  | 109.2    |
| C(21)-C(22)-H(22B)  | 110.4    | N(5)-C(25)-H(25B)   | 109.2    |
| H(22A)-C(22)-H(22B) | 108.6    | H(25A)-C(25)-H(25B) | 107.9    |
| O(1)-C(2)-C(1)      | 107.2(4) | N(4)-C(19)-C(20)    | 111.5(6) |
| O(1)-C(2)-H(2A)     | 110.3    | N(4)-C(19)-H(19A)   | 109.3    |
| C(1)-C(2)-H(2A)     | 110.3    | C(20)-C(19)-H(19A)  | 109.3    |
| O(1)-C(2)-H(2B)     | 110.3    | N(4)-C(19)-H(19B)   | 109.3    |
| C(1)-C(2)-H(2B)     | 110.3    | C(20)-C(19)-H(19B)  | 109.3    |
| H(2A)-C(2)-H(2B)    | 108.5    | H(19A)-C(19)-H(19B) | 108.0    |
| O(7)-C(21)-C(22)    | 111.5(4) | O(9)-C(26)-C(25)    | 107.1(5) |
| O(7)-C(21)-H(21A)   | 109.3    | O(9)-C(26)-H(26A)   | 110.3    |
| C(22)-C(21)-H(21A)  | 109.3    | C(25)-C(26)-H(26A)  | 110.3    |
| O(7)-C(21)-H(21B)   | 109.3    | O(9)-C(26)-H(26B)   | 110.3    |
| C(22)-C(21)-H(21B)  | 109.3    | C(25)-C(26)-H(26B)  | 110.3    |
| H(21A)-C(21)-H(21B) | 108.0    | H(26A)-C(26)-H(26B) | 108.6    |
| O(8)-C(23)-C(24)    | 107.1(5) | O(24)-Cl(3)-O(26)   | 116.2(7) |
| O(8)-C(23)-H(23A)   | 110.3    | O(24)-Cl(3)-O(27)   | 103.3(6) |
| C(24)-C(23)-H(23A)  | 110.3    | O(26)-Cl(3)-O(27)   | 110.9(4) |
| O(8)-C(23)-H(23B)   | 110.3    | O(24)-Cl(3)-O(25)   | 103.4(7) |
| C(24)-C(23)-H(23B)  | 110.3    | O(26)-Cl(3)-O(25)   | 111.0(5) |
| H(23A)-C(23)-H(23B) | 108.5    | O(27)-Cl(3)-O(25)   | 111.7(5) |
| O(21)-Cl(2)-O(20)   | 115.3(5) | O(12)-C(35)-C(36)   | 108.3(5) |
| O(21)-Cl(2)-O(23)   | 112.5(4) | O(12)-C(35)-H(35A)  | 110.0    |
| O(20)-Cl(2)-O(23)   | 109.0(4) | C(36)-C(35)-H(35A)  | 110.0    |
| O(21)-Cl(2)-O(22)   | 107.3(4) | O(12)-C(35)-H(35B)  | 110.0    |
| O(20)-Cl(2)-O(22)   | 106.4(4) | C(36)-C(35)-H(35B)  | 110.0    |
| O(23)-Cl(2)-O(22)   | 105.7(4) | H(35A)-C(35)-H(35B) | 108.4    |
| O(7)-C(20)-C(19)    | 111.1(5) | C(17)-C(18)-N(4)    | 113.7(6) |
| O(7)-C(20)-H(20A)   | 109.4    | C(17)-C(18)-H(18A)  | 108.8    |
| C(19)-C(20)-H(20A)  | 109.4    | N(4)-C(18)-H(18A)   | 108.8    |
| O(7)-C(20)-H(20B)   | 109.4    | C(17)-C(18)-H(18B)  | 108.8    |
| C(19)-C(20)-H(20B)  | 109.4    | N(4)-C(18)-H(18B)   | 108.8    |
| H(20A)-C(20)-H(20B) | 108.0    | H(18A)-C(18)-H(18B) | 107.7    |
| C(26)-C(25)-N(5)    | 112.2(6) | N(5)-C(36)-C(35)    | 110.5(5) |



|                     |          |                     |          |
|---------------------|----------|---------------------|----------|
| N(5)-C(36)-H(36A)   | 109.6    | O(11)-C(33)-H(33A)  | 109.6    |
| C(35)-C(36)-H(36A)  | 109.6    | C(34)-C(33)-H(33A)  | 109.6    |
| N(5)-C(36)-H(36B)   | 109.6    | O(11)-C(33)-H(33B)  | 109.6    |
| C(35)-C(36)-H(36B)  | 109.6    | C(34)-C(33)-H(33B)  | 109.6    |
| H(36A)-C(36)-H(36B) | 108.1    | H(33A)-C(33)-H(33B) | 108.1    |
| O(6)-C(17)-C(18)    | 106.5(6) | C(15)-C(16)-O(6)    | 112.0(7) |
| O(6)-C(17)-H(17A)   | 110.4    | C(15)-C(16)-H(16A)  | 109.2    |
| C(18)-C(17)-H(17A)  | 110.4    | O(6)-C(16)-H(16A)   | 109.2    |
| O(6)-C(17)-H(17B)   | 110.4    | C(15)-C(16)-H(16B)  | 109.2    |
| C(18)-C(17)-H(17B)  | 110.4    | O(6)-C(16)-H(16B)   | 109.2    |
| H(17A)-C(17)-H(17B) | 108.6    | H(16A)-C(16)-H(16B) | 107.9    |
| O(5)-C(15)-C(16)    | 106.3(6) | O(10)-C(28)-C(27)   | 112.9(7) |
| O(5)-C(15)-H(15A)   | 110.5    | O(10)-C(28)-H(28A)  | 109.0    |
| C(16)-C(15)-H(15A)  | 110.5    | C(27)-C(28)-H(28A)  | 109.0    |
| O(5)-C(15)-H(15B)   | 110.5    | O(10)-C(28)-H(28B)  | 109.0    |
| C(16)-C(15)-H(15B)  | 110.5    | C(27)-C(28)-H(28B)  | 109.0    |
| H(15A)-C(15)-H(15B) | 108.7    | H(28A)-C(28)-H(28B) | 107.8    |
| O(10)-C(29)-C(30)   | 110.3(6) | C(32)-C(31)-N(6)    | 114.4(8) |
| O(10)-C(29)-H(29A)  | 109.6    | C(32)-C(31)-H(31A)  | 108.7    |
| C(30)-C(29)-H(29A)  | 109.6    | N(6)-C(31)-H(31A)   | 108.7    |
| O(10)-C(29)-H(29B)  | 109.6    | C(32)-C(31)-H(31B)  | 108.7    |
| C(30)-C(29)-H(29B)  | 109.6    | N(6)-C(31)-H(31B)   | 108.7    |
| H(29A)-C(29)-H(29B) | 108.1    | H(31A)-C(31)-H(31B) | 107.6    |
| O(5)-C(14)-C(13)    | 107.3(5) | O(9)-C(27)-C(28)    | 106.3(6) |
| O(5)-C(14)-H(14A)   | 110.2    | O(9)-C(27)-H(27A)   | 110.5    |
| C(13)-C(14)-H(14A)  | 110.2    | C(28)-C(27)-H(27A)  | 110.5    |
| O(5)-C(14)-H(14B)   | 110.2    | O(9)-C(27)-H(27B)   | 110.5    |
| C(13)-C(14)-H(14B)  | 110.2    | C(28)-C(27)-H(27B)  | 110.5    |
| H(14A)-C(14)-H(14B) | 108.5    | H(27A)-C(27)-H(27B) | 108.7    |
| O(11)-C(32)-C(31)   | 107.4(6) | N(6)-C(30)-C(29)    | 110.3(7) |
| O(11)-C(32)-H(32A)  | 110.2    | N(6)-C(30)-H(30A)   | 109.6    |
| C(31)-C(32)-H(32A)  | 110.2    | C(29)-C(30)-H(30A)  | 109.6    |
| O(11)-C(32)-H(32B)  | 110.2    | N(6)-C(30)-H(30B)   | 109.6    |
| C(31)-C(32)-H(32B)  | 110.2    | C(29)-C(30)-H(30B)  | 109.6    |
| H(32A)-C(32)-H(32B) | 108.5    | H(30A)-C(30)-H(30B) | 108.1    |
| O(11)-C(33)-C(34)   | 110.2(5) | C(39)-C(38)-H(38C)  | 109.5    |

|                     |           |                      |           |
|---------------------|-----------|----------------------|-----------|
| C(39)-C(38)-H(38B)  | 109.5     | H(32E)-O(32)-H(32F)  | 113.7     |
| H(38C)-C(38)-H(38B) | 109.5     | O(29)-Cl(4)-O(31)    | 98(2)     |
| C(39)-C(38)-H(38A)  | 109.5     | O(29)-Cl(4)-O(28)    | 115.3(14) |
| H(38C)-C(38)-H(38A) | 109.5     | O(31)-Cl(4)-O(28)    | 110.5(8)  |
| H(38B)-C(38)-H(38A) | 109.5     | O(29)-Cl(4)-O(30)    | 113.4(12) |
| N(8)-C(41)-C(40)    | 179.1(9)  | O(31)-Cl(4)-O(30)    | 105.9(7)  |
| N(7)-C(39)-C(38)    | 178.8(11) | O(28)-Cl(4)-O(30)    | 112.6(7)  |
| C(41)-C(40)-H(40C)  | 109.5     | O(29')-Cl(4')-O(28') | 117(3)    |
| C(41)-C(40)-H(40B)  | 109.5     | O(29')-Cl(4')-O(31') | 93(4)     |
| H(40C)-C(40)-H(40B) | 109.5     | O(28')-Cl(4')-O(31') | 106.4(16) |
| C(41)-C(40)-H(40A)  | 109.5     | O(29')-Cl(4')-O(30') | 117(2)    |
| H(40C)-C(40)-H(40A) | 109.5     | O(28')-Cl(4')-O(30') | 112.0(15) |
| H(40B)-C(40)-H(40A) | 109.5     | O(31')-Cl(4')-O(30') | 109.1(17) |

---

Table 4B. Anisotropic displacement parameters ( $\text{\AA}^2 \times 10^3$ ) for **Compound 2**. The anisotropic displacement factor exponent takes the form:  $-2\pi^2 [ h^2 a^{*2} U_{11} + \dots + 2 h k a^* b^* U_{12} ]$

|     | $U_{11}$ | $U_{22}$ | $U_{33}$ | $U_{23}$ | $U_{13}$ | $U_{12}$ |
|-----|----------|----------|----------|----------|----------|----------|
| Cd1 | 23(1)    | 22(1)    | 28(1)    | 6(1)     | 6(1)     | 9(1)     |
| Cd2 | 24(1)    | 25(1)    | 33(1)    | 9(1)     | 7(1)     | 10(1)    |
| Cd3 | 33(1)    | 27(1)    | 29(1)    | 3(1)     | 8(1)     | 14(1)    |
| O13 | 30(2)    | 24(2)    | 33(2)    | 4(1)     | 9(1)     | 14(1)    |
| O15 | 25(2)    | 25(2)    | 28(2)    | 7(1)     | 10(1)    | 10(1)    |
| O4  | 26(2)    | 34(2)    | 27(2)    | 5(2)     | 5(1)     | 9(1)     |
| O8  | 38(2)    | 37(2)    | 33(2)    | 0(2)     | 4(2)     | 13(2)    |
| O14 | 34(2)    | 20(2)    | 33(2)    | 9(1)     | 9(2)     | 14(1)    |
| O1  | 33(2)    | 48(2)    | 31(2)    | 12(2)    | 5(2)     | 17(2)    |
| O12 | 40(2)    | 40(2)    | 41(2)    | 3(2)     | 2(2)     | 20(2)    |
| O2  | 35(2)    | 37(2)    | 39(2)    | 9(2)     | 2(2)     | 18(2)    |
| O6  | 32(2)    | 37(2)    | 67(3)    | -3(2)    | -1(2)    | 7(2)     |
| O7  | 38(2)    | 34(2)    | 33(2)    | 6(2)     | 2(2)     | 12(2)    |
| N2  | 34(2)    | 21(2)    | 34(2)    | 5(2)     | 8(2)     | 11(2)    |
| O5  | 45(2)    | 45(2)    | 56(3)    | 8(2)     | -6(2)    | 21(2)    |
| O10 | 84(3)    | 57(3)    | 41(3)    | 12(2)    | 8(2)     | 35(3)    |
| N1  | 27(2)    | 29(2)    | 32(2)    | 11(2)    | 10(2)    | 12(2)    |
| O11 | 30(2)    | 47(2)    | 76(3)    | 12(2)    | 15(2)    | 19(2)    |
| C34 | 41(3)    | 63(4)    | 53(4)    | -5(3)    | -11(3)   | 31(3)    |
| O3  | 36(2)    | 26(2)    | 35(2)    | 4(2)     | 5(2)     | 11(2)    |
| C10 | 34(3)    | 33(3)    | 30(3)    | 4(2)     | 0(2)     | 9(2)     |
| N3  | 37(2)    | 34(2)    | 54(3)    | 16(2)    | 21(2)    | 18(2)    |
| O9  | 67(3)    | 52(3)    | 47(3)    | 2(2)     | -10(2)   | 20(2)    |
| C5  | 38(3)    | 42(3)    | 57(4)    | 11(3)    | 6(3)     | 25(3)    |
| C8  | 51(3)    | 31(3)    | 39(3)    | 2(2)     | 10(3)    | 21(2)    |
| C12 | 27(2)    | 41(3)    | 44(3)    | 11(2)    | 15(2)    | 16(2)    |
| N4  | 32(2)    | 35(2)    | 71(4)    | 33(3)    | 6(2)     | 4(2)     |
| N5  | 43(3)    | 27(2)    | 55(3)    | 0(2)     | 11(2)    | 18(2)    |
| C7  | 46(3)    | 25(2)    | 41(3)    | -1(2)    | 1(2)     | 13(2)    |
| C9  | 41(3)    | 34(3)    | 28(3)    | 9(2)     | 6(2)     | 17(2)    |
| C3  | 38(3)    | 61(4)    | 37(3)    | 6(3)     | -9(2)    | 23(3)    |

|     |        |        |        |        |        |        |
|-----|--------|--------|--------|--------|--------|--------|
| C11 | 38(1)  | 41(1)  | 34(1)  | 1(1)   | 2(1)   | 19(1)  |
| C37 | 18(2)  | 25(2)  | 24(2)  | 4(2)   | 0(2)   | 7(2)   |
| O19 | 35(2)  | 87(4)  | 77(4)  | 19(3)  | 7(2)   | 19(2)  |
| C11 | 18(2)  | 38(3)  | 47(3)  | 7(2)   | 5(2)   | 7(2)   |
| C1  | 44(3)  | 45(3)  | 30(3)  | 8(2)   | 15(2)  | 17(3)  |
| N6  | 73(4)  | 52(3)  | 64(4)  | 19(3)  | 39(3)  | 39(3)  |
| C6  | 40(3)  | 41(3)  | 50(4)  | 10(3)  | 16(3)  | 24(3)  |
| O18 | 84(4)  | 55(3)  | 110(5) | 0(3)   | 28(3)  | 42(3)  |
| O17 | 57(3)  | 66(3)  | 154(6) | 60(4)  | 30(4)  | 23(3)  |
| C24 | 52(4)  | 32(3)  | 77(5)  | 7(3)   | 28(3)  | 21(3)  |
| C13 | 58(4)  | 54(4)  | 86(5)  | 40(4)  | 37(4)  | 46(3)  |
| C4  | 29(3)  | 44(3)  | 42(3)  | 3(3)   | -3(2)  | 13(2)  |
| C22 | 34(3)  | 49(3)  | 32(3)  | -2(3)  | 0(2)   | 6(2)   |
| C2  | 45(3)  | 50(3)  | 28(3)  | 13(3)  | 8(2)   | 17(3)  |
| C21 | 30(3)  | 44(3)  | 43(3)  | 9(3)   | 2(2)   | 12(2)  |
| C23 | 51(4)  | 46(3)  | 53(4)  | -7(3)  | 18(3)  | 17(3)  |
| Cl2 | 48(1)  | 34(1)  | 61(1)  | 3(1)   | 4(1)   | 23(1)  |
| O23 | 61(3)  | 52(3)  | 73(4)  | 2(2)   | -3(3)  | 18(2)  |
| C20 | 46(3)  | 43(3)  | 38(3)  | 20(3)  | -2(3)  | 12(3)  |
| O22 | 80(4)  | 86(4)  | 60(4)  | -3(3)  | -1(3)  | 31(3)  |
| O21 | 108(5) | 113(5) | 112(6) | 16(4)  | 69(4)  | 59(4)  |
| C25 | 53(4)  | 24(3)  | 79(5)  | -5(3)  | 4(3)   | 8(3)   |
| O20 | 129(5) | 50(3)  | 134(6) | 16(3)  | 11(5)  | 59(4)  |
| C19 | 49(3)  | 34(2)  | 79(4)  | 24(2)  | -1(2)  | 5(2)   |
| C26 | 61(4)  | 41(3)  | 64(5)  | -16(3) | -6(4)  | 9(3)   |
| Cl3 | 43(1)  | 44(1)  | 40(1)  | 15(1)  | 2(1)   | 10(1)  |
| C35 | 68(4)  | 52(4)  | 48(4)  | 13(3)  | 12(3)  | 42(3)  |
| O27 | 45(3)  | 159(6) | 55(4)  | 7(4)   | 0(3)   | -4(3)  |
| O26 | 93(5)  | 124(6) | 61(4)  | 34(4)  | 4(3)   | -39(4) |
| C18 | 49(3)  | 34(2)  | 79(4)  | 24(2)  | -1(2)  | 5(2)   |
| C36 | 59(4)  | 31(3)  | 58(4)  | 15(3)  | 15(3)  | 24(3)  |
| C17 | 55(4)  | 37(3)  | 85(6)  | 8(4)   | 13(4)  | 4(3)   |
| C15 | 70(5)  | 67(5)  | 62(5)  | 20(4)  | -11(4) | 24(4)  |
| O16 | 146(6) | 216(9) | 44(4)  | -44(4) | -26(4) | 128(7) |
| C29 | 134(6) | 71(4)  | 41(3)  | 14(3)  | 13(3)  | 57(4)  |
| C14 | 44(3)  | 71(5)  | 75(5)  | 37(4)  | 12(3)  | 35(3)  |

|      |         |        |         |        |         |        |
|------|---------|--------|---------|--------|---------|--------|
| O25  | 100(5)  | 150(7) | 66(4)   | -38(4) | 19(4)   | 1(5)   |
| C32  | 40(4)   | 92(6)  | 99(7)   | 30(5)  | 30(4)   | 37(4)  |
| C33  | 41(3)   | 51(4)  | 59(4)   | -11(3) | -5(3)   | 14(3)  |
| C16  | 52(4)   | 76(5)  | 52(5)   | 4(4)   | -3(3)   | 8(4)   |
| C28  | 134(6)  | 71(4)  | 41(3)   | 14(3)  | 13(3)   | 57(4)  |
| C31  | 102(5)  | 82(4)  | 107(6)  | 24(4)  | 59(4)   | 49(4)  |
| C27  | 106(7)  | 83(6)  | 47(5)   | -4(4)  | -26(4)  | 47(5)  |
| C30  | 102(5)  | 82(4)  | 107(6)  | 24(4)  | 59(4)   | 49(4)  |
| O24  | 221(10) | 147(8) | 177(10) | 61(7)  | 17(8)   | 139(8) |
| N8   | 53(3)   | 66(4)  | 53(4)   | 5(3)   | 16(3)   | 20(3)  |
| C38  | 48(3)   | 55(4)  | 46(4)   | 1(3)   | 6(3)    | 22(3)  |
| C41  | 45(4)   | 62(4)  | 33(3)   | 2(3)   | 6(3)    | 13(3)  |
| C39  | 105(6)  | 45(4)  | 50(4)   | 1(3)   | 10(4)   | 26(4)  |
| C40  | 68(5)   | 134(8) | 67(6)   | 26(5)  | 13(4)   | 53(6)  |
| N7   | 273(15) | 86(6)  | 67(6)   | 30(5)  | 9(7)    | 65(8)  |
| Cl4  | 46(2)   | 33(2)  | 44(2)   | 9(1)   | 20(1)   | 20(2)  |
| O28  | 57(5)   | 55(4)  | 128(9)  | -10(5) | 24(5)   | 35(5)  |
| O29  | 189(14) | 51(6)  | 188(9)  | 51(7)  | 161(14) | 50(7)  |
| O30  | 69(8)   | 33(3)  | 75(9)   | 0(4)   | 12(5)   | 20(4)  |
| O31  | 105(6)  | 117(7) | 67(6)   | 20(5)  | -19(5)  | 43(6)  |
| Cl4' | 46(2)   | 33(2)  | 44(2)   | 9(1)   | 20(1)   | 20(2)  |
| O28' | 57(5)   | 55(4)  | 128(9)  | -10(5) | 24(5)   | 35(5)  |
| O29' | 189(14) | 51(6)  | 188(9)  | 51(7)  | 161(14) | 50(7)  |
| O30' | 69(8)   | 33(3)  | 75(9)   | 0(4)   | 12(5)   | 20(4)  |
| O31' | 105(6)  | 117(7) | 67(6)   | 20(5)  | -19(5)  | 43(6)  |

---

Table 5B. Hydrogen coordinates ( $\times 10^4$ ) and isotropic displacement parameters ( $\text{\AA}^2 \times 10^3$ ) for **Compound 2**.

|      | x    | y     | z    | U(eq) |
|------|------|-------|------|-------|
| H2C  | 3384 | 12181 | 2381 | 36    |
| H1C  | 5094 | 11731 | 1841 | 35    |
| H34A | 6662 | 7226  | 3015 | 62    |
| H34B | 6074 | 7416  | 3592 | 62    |
| H10A | 5930 | 11759 | 3835 | 42    |
| H10B | 6174 | 10694 | 3910 | 42    |
| H3C  | -501 | 6902  | 3771 | 48    |
| H5A  | 230  | 10628 | 2189 | 52    |
| H5B  | 1333 | 11156 | 1802 | 52    |
| H8A  | 4431 | 12094 | 4156 | 48    |
| H8B  | 3017 | 11704 | 3963 | 48    |
| H12A | 6681 | 11384 | 1878 | 44    |
| H12B | 5860 | 10125 | 2037 | 44    |
| H4C  | -719 | 4682  | 3718 | 60    |
| H5C  | 3662 | 4750  | 1725 | 49    |
| H7A  | 3965 | 13091 | 3353 | 47    |
| H7B  | 4846 | 12592 | 3197 | 47    |
| H9A  | 4098 | 9474  | 3864 | 41    |
| H9B  | 4510 | 10498 | 4399 | 41    |
| H3A  | 929  | 8896  | 682  | 56    |
| H3B  | 1247 | 10159 | 948  | 56    |
| H11A | 7081 | 11281 | 2942 | 44    |
| H11B | 6547 | 12147 | 2834 | 44    |
| H1A  | 4469 | 9692  | 1158 | 48    |
| H1B  | 5162 | 10927 | 941  | 48    |
| H6C  | 5706 | 6533  | 1324 | 67    |
| H6A  | 1853 | 12172 | 2806 | 49    |
| H6B  | 1644 | 11037 | 3099 | 49    |
| H24A | 1551 | 8974  | 3835 | 62    |
| H24B | 514  | 8654  | 4258 | 62    |

|      |       |       |      |    |
|------|-------|-------|------|----|
| H13A | -882  | 8127  | 3232 | 66 |
| H13B | 246   | 8382  | 2884 | 66 |
| H4A  | -284  | 8925  | 1443 | 49 |
| H4B  | 429   | 8226  | 1609 | 49 |
| H22A | 2720  | 6858  | 4869 | 53 |
| H22B | 3818  | 8048  | 4758 | 53 |
| H2A  | 3399  | 11130 | 916  | 51 |
| H2B  | 3097  | 10002 | 479  | 51 |
| H21A | 4009  | 7223  | 3842 | 50 |
| H21B | 4076  | 6482  | 4379 | 50 |
| H23A | 2250  | 8682  | 4800 | 63 |
| H23B | 1102  | 7437  | 4736 | 63 |
| H20A | 2413  | 4971  | 4553 | 55 |
| H20B | 1791  | 4096  | 3936 | 55 |
| H25A | 1700  | 3502  | 1555 | 68 |
| H25B | 1363  | 4432  | 1823 | 68 |
| H19A | 226   | 4012  | 4407 | 72 |
| H19B | 824   | 5366  | 4520 | 72 |
| H26A | 2263  | 4460  | 702  | 77 |
| H26B | 888   | 4145  | 760  | 77 |
| H35A | 4539  | 5385  | 3329 | 60 |
| H35B | 5058  | 5263  | 2712 | 60 |
| H18A | 380   | 3585  | 3142 | 72 |
| H18B | -924  | 2977  | 3351 | 72 |
| H36A | 2997  | 3996  | 2581 | 57 |
| H36B | 2706  | 5010  | 2752 | 57 |
| H17A | -1136 | 2976  | 2307 | 79 |
| H17B | -1650 | 3753  | 2602 | 79 |
| H15A | -1486 | 5710  | 1507 | 85 |
| H15B | -2003 | 4916  | 2039 | 85 |
| H29A | 5258  | 8341  | 290  | 94 |
| H29B | 4048  | 7294  | -84  | 94 |
| H14A | -1895 | 6250  | 2749 | 71 |
| H14B | -1560 | 7122  | 2240 | 71 |
| H32A | 7288  | 7953  | 2198 | 86 |
| H32B | 7793  | 9264  | 2095 | 86 |

|      |       |      |      |     |
|------|-------|------|------|-----|
| H33A | 5735  | 8794 | 3140 | 66  |
| H33B | 7135  | 9136 | 3147 | 66  |
| H16A | 141   | 5409 | 1569 | 84  |
| H16B | -1050 | 4198 | 1483 | 84  |
| H28A | 2558  | 7726 | 133  | 94  |
| H28B | 2296  | 7747 | 827  | 94  |
| H31A | 7253  | 8131 | 1162 | 108 |
| H31B | 6465  | 8776 | 1195 | 108 |
| H27A | 1006  | 5969 | 322  | 98  |
| H27B | 2118  | 5847 | 105  | 98  |
| H30A | 4314  | 5997 | 486  | 108 |
| H30B | 5628  | 6804 | 320  | 108 |
| H38C | 8355  | 8658 | 93   | 62  |
| H38B | 7592  | 7645 | -453 | 62  |
| H38A | 9041  | 8246 | -342 | 62  |
| H40C | 7662  | 7651 | 4722 | 104 |
| H40B | 8458  | 8767 | 5205 | 104 |
| H40A | 8551  | 8816 | 4486 | 104 |
| H32E | 5894  | 5649 | 4870 | 236 |
| H32F | 5247  | 6066 | 5204 | 236 |

---



Table 6B. Torsion angles [°] for **Compound 2**.

|                 |           |                 |           |
|-----------------|-----------|-----------------|-----------|
| N2-Cd1-O13-C37  | -179.8(3) | O5-Cd2-O14-C37  | 71.8(3)   |
| N1-Cd1-O13-C37  | -5.2(4)   | O6-Cd2-O14-C37  | 134.3(3)  |
| O4-Cd1-O13-C37  | -72.9(3)  | O13-Cd1-O1-C3   | 72.2(4)   |
| O1-Cd1-O13-C37  | 67.1(3)   | N2-Cd1-O1-C3    | -59.7(4)  |
| O2-Cd1-O13-C37  | 126.7(3)  | N1-Cd1-O1-C3    | -153.8(4) |
| N5-Cd3-O15-C37  | 9.7(4)    | O4-Cd1-O1-C3    | -177.1(4) |
| N6-Cd3-O15-C37  | -172.6(3) | O2-Cd1-O1-C3    | 0.1(4)    |
| O12-Cd3-O15-C37 | -61.0(3)  | O13-Cd1-O1-C2   | -145.3(4) |
| O9-Cd3-O15-C37  | 77.4(3)   | N2-Cd1-O1-C2    | 82.7(4)   |
| O11-Cd3-O15-C37 | -121.1(3) | N1-Cd1-O1-C2    | -11.3(4)  |
| O10-Cd3-O15-C37 | 138.9(3)  | O4-Cd1-O1-C2    | -34.6(4)  |
| O13-Cd1-O4-C10  | -72.4(4)  | O2-Cd1-O1-C2    | 142.6(4)  |
| N2-Cd1-O4-C10   | 57.2(4)   | O15-Cd3-O12-C34 | -76.5(4)  |
| N1-Cd1-O4-C10   | 151.7(4)  | N5-Cd3-O12-C34  | 151.3(5)  |
| O1-Cd1-O4-C10   | 175.0(3)  | N6-Cd3-O12-C34  | 56.2(4)   |
| O2-Cd1-O4-C10   | 2.3(6)    | O9-Cd3-O12-C34  | 175.2(4)  |
| O13-Cd1-O4-C11  | 145.2(3)  | O11-Cd3-O12-C34 | -3.6(4)   |
| N2-Cd1-O4-C11   | -85.2(3)  | O10-Cd3-O12-C34 | 8.4(7)    |
| N1-Cd1-O4-C11   | 9.4(3)    | O15-Cd3-O12-C35 | 138.4(4)  |
| O1-Cd1-O4-C11   | 32.6(4)   | N5-Cd3-O12-C35  | 6.2(4)    |
| O2-Cd1-O4-C11   | -140.1(4) | N6-Cd3-O12-C35  | -88.9(4)  |
| O14-Cd2-O8-C22  | -72.7(4)  | O9-Cd3-O12-C35  | 30.0(5)   |
| N4-Cd2-O8-C22   | 60.5(4)   | O11-Cd3-O12-C35 | -148.7(4) |
| N3-Cd2-O8-C22   | 157.5(4)  | O10-Cd3-O12-C35 | -136.8(5) |
| O5-Cd2-O8-C22   | -178.2(4) | O13-Cd1-O2-C4   | -80.6(3)  |
| O6-Cd2-O8-C22   | 16.7(6)   | N2-Cd1-O2-C4    | 142.4(4)  |
| O14-Cd2-O8-C23  | 142.8(4)  | N1-Cd1-O2-C4    | 58.5(4)   |
| N4-Cd2-O8-C23   | -84.0(4)  | O4-Cd1-O2-C4    | -158.1(4) |
| N3-Cd2-O8-C23   | 13.1(4)   | O1-Cd1-O2-C4    | 27.5(3)   |
| O5-Cd2-O8-C23   | 37.3(4)   | O13-Cd1-O2-C5   | 150.5(4)  |
| O6-Cd2-O8-C23   | -127.7(5) | N2-Cd1-O2-C5    | 13.4(3)   |
| N4-Cd2-O14-C37  | -175.5(3) | N1-Cd1-O2-C5    | -70.5(4)  |
| N3-Cd2-O14-C37  | 6.8(4)    | O4-Cd1-O2-C5    | 73.0(5)   |
| O8-Cd2-O14-C37  | -67.0(3)  | O1-Cd1-O2-C5    | -101.5(4) |

|                 |           |                 |           |
|-----------------|-----------|-----------------|-----------|
| O14-Cd2-O6-C17  | 156.3(5)  | O15-Cd3-O10-C29 | 155.7(5)  |
| N4-Cd2-O6-C17   | 15.2(4)   | N5-Cd3-O10-C29  | -68.7(5)  |
| N3-Cd2-O6-C17   | -70.8(5)  | N6-Cd3-O10-C29  | 15.0(5)   |
| O8-Cd2-O6-C17   | 62.5(6)   | O12-Cd3-O10-C29 | 67.4(7)   |
| O5-Cd2-O6-C17   | -106.1(5) | O9-Cd3-O10-C29  | -102.4(5) |
| O14-Cd2-O6-C16  | -75.4(4)  | O11-Cd3-O10-C29 | 78.1(5)   |
| N4-Cd2-O6-C16   | 143.6(4)  | O13-Cd1-N1-C1   | 65.9(4)   |
| N3-Cd2-O6-C16   | 57.6(5)   | N2-Cd1-N1-C1    | -118.5(4) |
| O8-Cd2-O6-C16   | -169.1(4) | O4-Cd1-N1-C1    | 143.8(4)  |
| O5-Cd2-O6-C16   | 22.2(4)   | O1-Cd1-N1-C1    | -19.5(3)  |
| O13-Cd1-N2-C6   | -38.2(4)  | O2-Cd1-N1-C1    | -48.7(4)  |
| N1-Cd1-N2-C6    | 145.7(4)  | O13-Cd1-N1-C12  | -57.0(4)  |
| O4-Cd1-N2-C6    | -143.1(4) | N2-Cd1-N1-C12   | 118.7(3)  |
| O1-Cd1-N2-C6    | 74.8(4)   | O4-Cd1-N1-C12   | 21.0(3)   |
| O2-Cd1-N2-C6    | 19.4(3)   | O1-Cd1-N1-C12   | -142.3(4) |
| O13-Cd1-N2-C7   | 88.8(3)   | O2-Cd1-N1-C12   | -171.6(3) |
| N1-Cd1-N2-C7    | -87.3(3)  | O15-Cd3-O11-C32 | -150.1(5) |
| O4-Cd1-N2-C7    | -16.1(3)  | N5-Cd3-O11-C32  | 73.7(5)   |
| O1-Cd1-N2-C7    | -158.2(3) | N6-Cd3-O11-C32  | -10.8(5)  |
| O2-Cd1-N2-C7    | 146.4(4)  | O12-Cd3-O11-C32 | 103.4(5)  |
| O14-Cd2-O5-C14  | -143.1(4) | O9-Cd3-O11-C32  | -73.9(7)  |
| N4-Cd2-O5-C14   | 84.2(4)   | O10-Cd3-O11-C32 | -72.5(5)  |
| N3-Cd2-O5-C14   | -9.4(4)   | O15-Cd3-O11-C33 | 80.3(4)   |
| O8-Cd2-O5-C14   | -33.6(5)  | N5-Cd3-O11-C33  | -55.9(4)  |
| O6-Cd2-O5-C14   | 140.5(4)  | N6-Cd3-O11-C33  | -140.5(4) |
| O14-Cd2-O5-C15  | 82.3(5)   | O12-Cd3-O11-C33 | -26.2(4)  |
| N4-Cd2-O5-C15   | -50.4(6)  | O9-Cd3-O11-C33  | 156.4(5)  |
| N3-Cd2-O5-C15   | -144.0(6) | O10-Cd3-O11-C33 | 157.8(4)  |
| O8-Cd2-O5-C15   | -168.2(5) | C35-O12-C34-C33 | 175.4(5)  |
| O6-Cd2-O5-C15   | 5.9(5)    | Cd3-O12-C34-C33 | 30.7(7)   |
| O15-Cd3-O10-C28 | -72.7(4)  | C11-O4-C10-C9   | 169.9(4)  |
| N5-Cd3-O10-C28  | 62.8(5)   | Cd1-O4-C10-C9   | 27.8(5)   |
| N6-Cd3-O10-C28  | 146.6(5)  | O14-Cd2-N3-C24  | -71.5(4)  |
| O12-Cd3-O10-C28 | -161.1(5) | N4-Cd2-N3-C24   | 110.3(4)  |
| O9-Cd3-O10-C28  | 29.2(4)   | O8-Cd2-N3-C24   | 17.1(4)   |
| O11-Cd3-O10-C28 | -150.3(4) | O5-Cd2-N3-C24   | -145.5(4) |

|                |           |                 |           |
|----------------|-----------|-----------------|-----------|
| O6-Cd2-N3-C24  | -178.9(4) | O9-Cd3-N5-C36   | -138.9(4) |
| O14-Cd2-N3-C13 | 53.2(4)   | O11-Cd3-N5-C36  | 51.8(4)   |
| N4-Cd2-N3-C13  | -125.1(4) | O10-Cd3-N5-C36  | -170.8(4) |
| O8-Cd2-N3-C13  | 141.7(4)  | O15-Cd3-N5-C25  | 64.4(5)   |
| O5-Cd2-N3-C13  | -20.9(4)  | N6-Cd3-N5-C25   | -113.8(5) |
| O6-Cd2-N3-C13  | -54.2(4)  | O12-Cd3-N5-C25  | 148.3(5)  |
| O15-Cd3-O9-C26 | -149.5(5) | O9-Cd3-N5-C25   | -14.2(4)  |
| N5-Cd3-O9-C26  | -15.9(5)  | O11-Cd3-N5-C25  | 176.4(4)  |
| N6-Cd3-O9-C26  | 78.8(5)   | O10-Cd3-N5-C25  | -46.1(5)  |
| O12-Cd3-O9-C26 | -39.7(6)  | C6-N2-C7-C8     | 63.6(6)   |
| O11-Cd3-O9-C26 | 136.9(5)  | Cd1-N2-C7-C8    | -63.7(5)  |
| O10-Cd3-O9-C26 | 135.4(5)  | O3-C8-C7-N2     | 45.0(6)   |
| O15-Cd3-O9-C27 | 73.3(6)   | C8-O3-C9-C10    | -68.8(6)  |
| N5-Cd3-O9-C27  | -153.0(6) | O4-C10-C9-O3    | -56.2(6)  |
| N6-Cd3-O9-C27  | -58.4(6)  | C2-O1-C3-C4     | -167.2(5) |
| O12-Cd3-O9-C27 | -176.8(5) | Cd1-O1-C3-C4    | -25.4(6)  |
| O11-Cd3-O9-C27 | -0.2(9)   | Cd1-O13-C37-O14 | 179.0(3)  |
| O10-Cd3-O9-C27 | -1.7(6)   | Cd1-O13-C37-O15 | -1.8(5)   |
| C4-O2-C5-C6    | -169.5(4) | Cd2-O14-C37-O13 | 1.2(5)    |
| Cd1-O2-C5-C6   | -42.4(5)  | Cd2-O14-C37-O15 | -178.0(3) |
| C9-O3-C8-C7    | 113.8(5)  | Cd3-O15-C37-O13 | 177.4(3)  |
| C1-N1-C12-C11  | -175.4(4) | Cd3-O15-C37-O14 | -3.4(5)   |
| Cd1-N1-C12-C11 | -50.4(5)  | C10-O4-C11-C12  | 176.6(4)  |
| O14-Cd2-N4-C19 | 87.7(5)   | Cd1-O4-C11-C12  | -37.2(5)  |
| N3-Cd2-N4-C19  | -94.1(5)  | N1-C12-C11-O4   | 58.1(6)   |
| O8-Cd2-N4-C19  | -23.5(5)  | C12-N1-C1-C2    | 173.7(4)  |
| O5-Cd2-N4-C19  | -166.0(5) | Cd1-N1-C1-C2    | 49.2(5)   |
| O6-Cd2-N4-C19  | 141.3(5)  | O15-Cd3-N6-C30  | -92.5(5)  |
| O14-Cd2-N4-C18 | -38.6(5)  | N5-Cd3-N6-C30   | 85.8(5)   |
| N3-Cd2-N4-C18  | 139.7(4)  | O12-Cd3-N6-C30  | 156.2(5)  |
| O8-Cd2-N4-C18  | -149.8(4) | O9-Cd3-N6-C30   | 14.7(5)   |
| O5-Cd2-N4-C18  | 67.7(4)   | O11-Cd3-N6-C30  | -148.0(5) |
| O6-Cd2-N4-C18  | 15.0(4)   | O10-Cd3-N6-C30  | -39.4(5)  |
| O15-Cd3-N5-C36 | -60.3(4)  | O15-Cd3-N6-C31  | 37.6(7)   |
| N6-Cd3-N5-C36  | 121.5(4)  | N5-Cd3-N6-C31   | -144.1(6) |
| O12-Cd3-N5-C36 | 23.6(4)   | O12-Cd3-N6-C31  | -73.6(6)  |

|                 |           |                 |           |
|-----------------|-----------|-----------------|-----------|
| O9-Cd3-N6-C31   | 144.9(6)  | C19-N4-C18-C17  | -173.3(6) |
| O11-Cd3-N6-C31  | -17.9(6)  | Cd2-N4-C18-C17  | -47.4(7)  |
| O10-Cd3-N6-C31  | 90.7(6)   | C25-N5-C36-C35  | -179.5(5) |
| C7-N2-C6-C5     | -178.0(4) | Cd3-N5-C36-C35  | -52.5(5)  |
| Cd1-N2-C6-C5    | -52.2(5)  | O12-C35-C36-N5  | 57.0(6)   |
| O2-C5-C6-N2     | 63.7(6)   | C16-O6-C17-C18  | -169.6(7) |
| C13-N3-C24-C23  | -171.2(5) | Cd2-O6-C17-C18  | -43.0(7)  |
| Cd2-N3-C24-C23  | -46.7(6)  | N4-C18-C17-O6   | 61.3(8)   |
| C24-N3-C13-C14  | 177.1(5)  | C14-O5-C15-C16  | -168.7(6) |
| Cd2-N3-C13-C14  | 51.2(6)   | Cd2-O5-C15-C16  | -33.1(8)  |
| C5-O2-C4-C3     | 72.6(6)   | C28-O10-C29-C30 | -116.7(8) |
| Cd1-O2-C4-C3    | -53.0(5)  | Cd3-O10-C29-C30 | 10.5(9)   |
| O1-C3-C4-O2     | 50.7(6)   | C15-O5-C14-C13  | 178.1(5)  |
| C23-O8-C22-C21  | 171.8(4)  | Cd2-O5-C14-C13  | 37.5(6)   |
| Cd2-O8-C22-C21  | 27.9(6)   | N3-C13-C14-O5   | -59.4(7)  |
| C3-O1-C2-C1     | -175.6(5) | C33-O11-C32-C31 | 164.9(6)  |
| Cd1-O1-C2-C1    | 38.5(5)   | Cd3-O11-C32-C31 | 36.9(8)   |
| N1-C1-C2-O1     | -58.4(6)  | C32-O11-C33-C34 | -74.4(7)  |
| C20-O7-C21-C22  | -69.9(6)  | Cd3-O11-C33-C34 | 53.8(6)   |
| O8-C22-C21-O7   | -55.0(6)  | O12-C34-C33-O11 | -54.0(7)  |
| C22-O8-C23-C24  | 172.1(5)  | O5-C15-C16-O6   | 53.5(8)   |
| Cd2-O8-C23-C24  | -40.1(5)  | C17-O6-C16-C15  | 75.8(8)   |
| N3-C24-C23-O8   | 57.3(6)   | Cd2-O6-C16-C15  | -50.6(7)  |
| C21-O7-C20-C19  | 106.9(6)  | C29-O10-C28-C27 | 71.8(8)   |
| C36-N5-C25-C26  | 171.0(6)  | Cd3-O10-C28-C27 | -57.3(7)  |
| Cd3-N5-C25-C26  | 44.8(7)   | O11-C32-C31-N6  | -57.1(10) |
| C18-N4-C19-C20  | 65.4(6)   | C30-N6-C31-C32  | 176.4(7)  |
| Cd2-N4-C19-C20  | -60.3(6)  | Cd3-N6-C31-C32  | 48.2(9)   |
| O7-C20-C19-N4   | 48.5(7)   | C26-O9-C27-C28  | -160.8(7) |
| C27-O9-C26-C25  | -176.1(7) | Cd3-O9-C27-C28  | -24.5(10) |
| Cd3-O9-C26-C25  | 42.9(7)   | O10-C28-C27-O9  | 54.4(10)  |
| N5-C25-C26-O9   | -58.5(8)  | C31-N6-C30-C29  | -66.6(9)  |
| C34-O12-C35-C36 | 177.4(5)  | Cd3-N6-C30-C29  | 62.7(8)   |
| Cd3-O12-C35-C36 | -34.1(6)  | O10-C29-C30-N6  | -45.9(10) |

Figure S1B. Thermal ellipsoid perspectives of cation in **2**.

a. Numbered perspective (50% probability) of 4+ trinuclear cation.

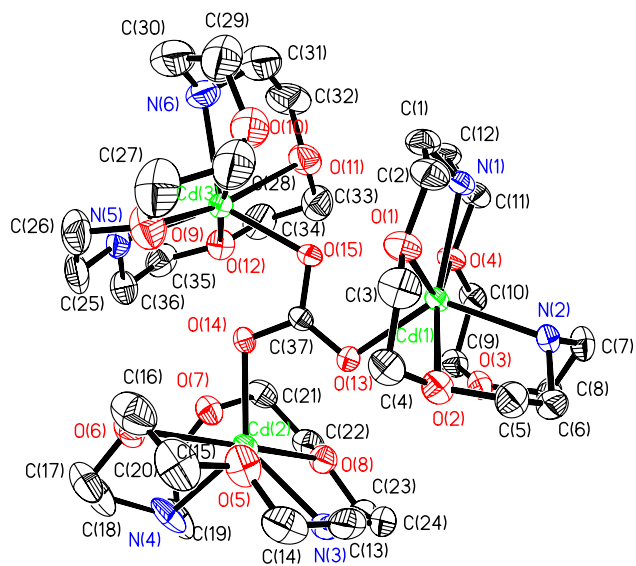

b. Unlabeled perspective.

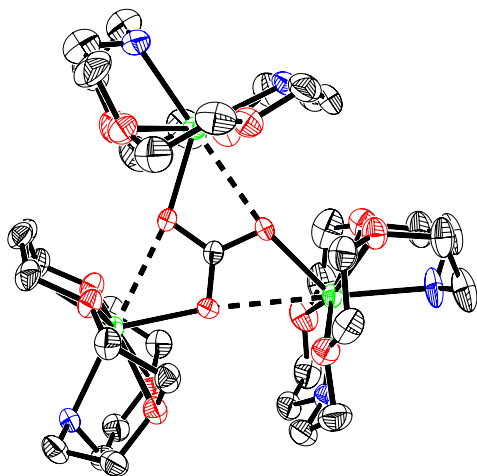

Figure SB2. Cd Coordination Environment Overlays

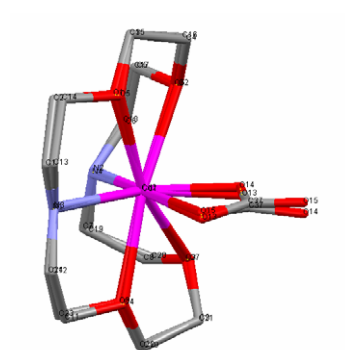

a. Cd1-Cd2 coordination environment overlay.

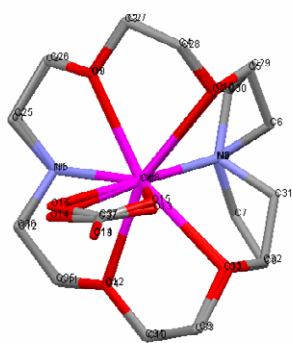

b. Cd1-Cd3 coordination environment overlay. Notice how the ethylene straps next to a N atom are in different conformations.

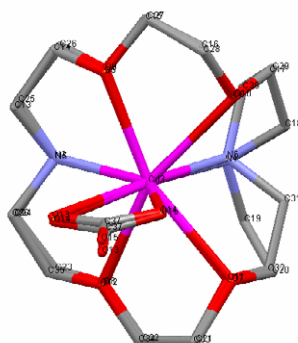

c. Cd2-Cd3 coordination environment overlay. Notice how the ethylene straps next to a N atom are in different conformations.

Figure S3B. Angles between the least-squares planes of the ligated O atoms at each Cd center and neighboring analogous Cd coordination spheres.

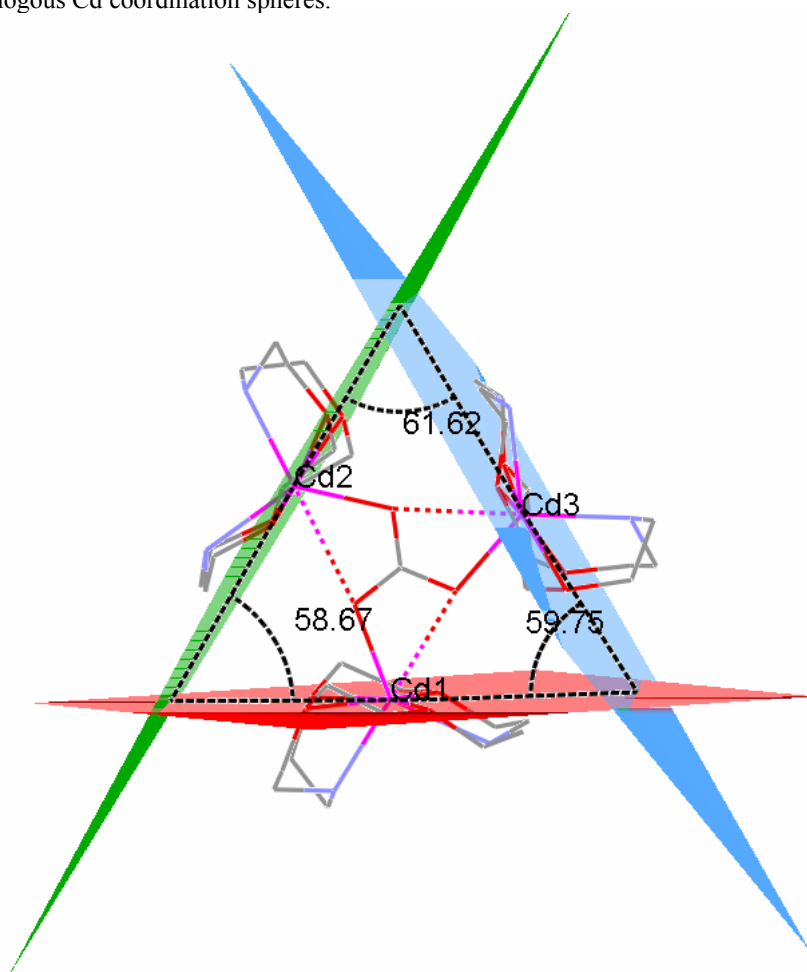

Figure S4B. Angle between least-squares planes formed by the Cd1, O1-O4 plane and the Cd1,N1,N2,O13,O15 plane. The other Cd centers exhibit similar angles between the CdO<sub>4</sub> plane (only O atoms from 18O4N2) and the Cd<sub>3</sub>N<sub>6</sub>CO<sub>3</sub> plane.

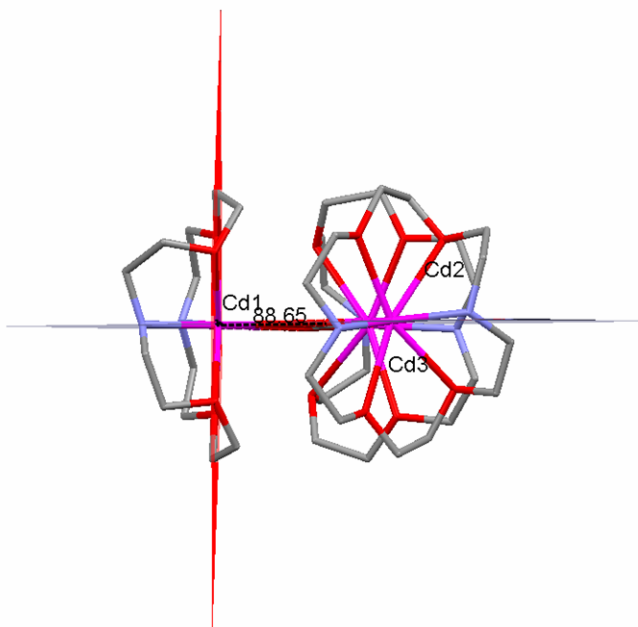



Figure S5B. Environment around carbonate ion in 2.

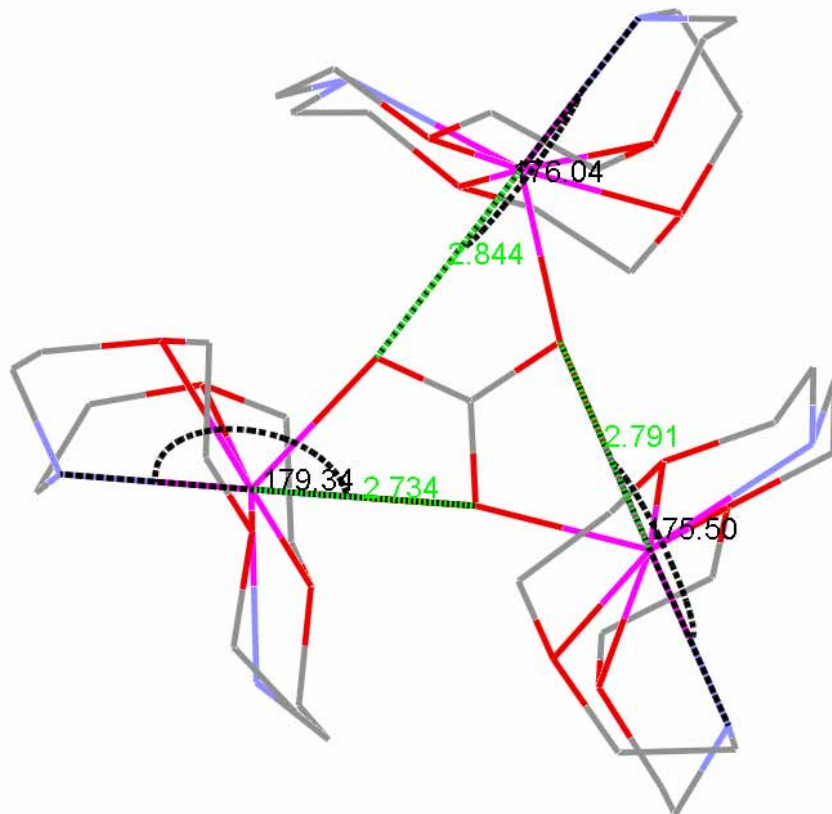

Figure S6B. Packing diagram for **2**. Disordered water over inversion center at center of cell. Perchlorates are close to the disordered water.

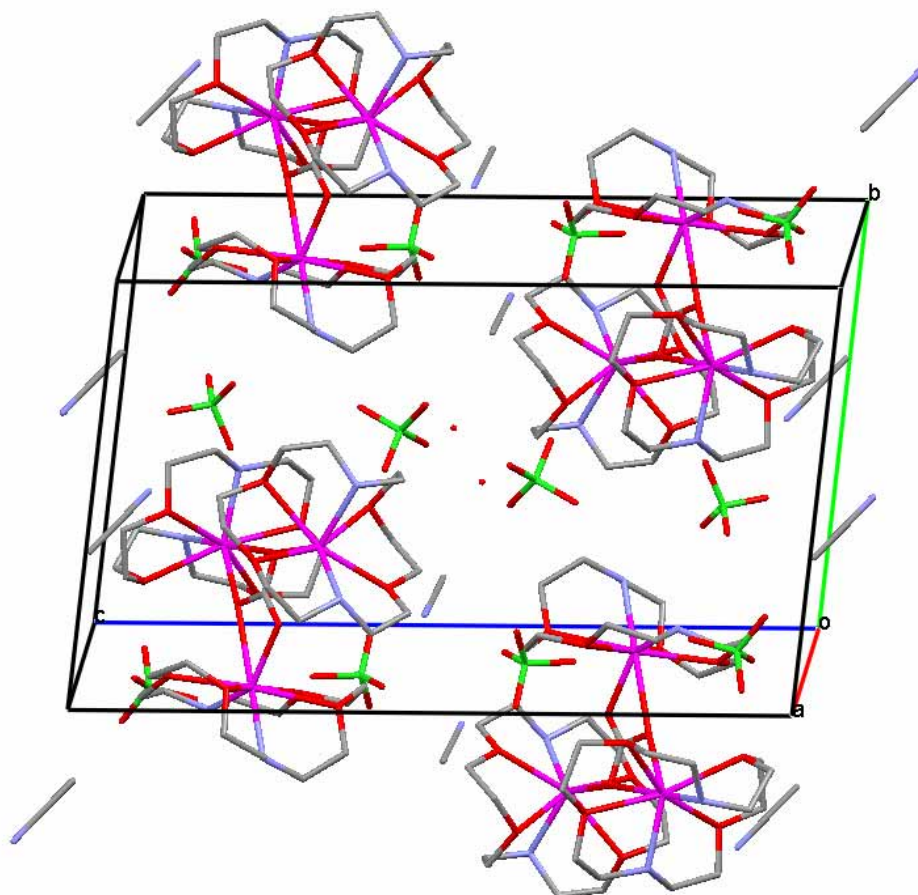

## REFERENCES for Supporting Experimental Information

1. (a) CrystalClear; Rigaku/MSC, The Woodlands, TX, USA, 1999. (b) Jacobson, R.A., REQAB, subroutine of CrystalClear; Rigaku/MSC, The Woodlands, TX, USA, 1999.
2. SHELXTL 5.1 1998-1999, Sheldrick, G.M., Bruker AXS, Madison, WI, USA.
3. *Cambridge Structural Database* May, 2007, Cambridge Crystallographic Data Centre, 12 Union Road, Cambridge CB2 1EZ. U.K. To our knowledge, only 19 complexes in the current Cambridge Crystallographic Database have structures which exhibit  $\mu_3$ -carbonato bridging. Most of these are either Cu(II) or Zn(II).
4. X. Liang, J.A. Parkinson, S. Parsons, M. Weishaulp, P.J. Sadler, *Inorg. Chem.*, 2002, **41**, 4539; L.-Y. Kong, H-F. Zhu, Y.-Q. Huang, T.-a. Okamura, X.-H. Lu, Y. Song, G.-X. Liu, W.-Y. Sun, N. Ueyama, *Inorg. Chem.*, 2006, **45**, 8098.
5. A. Bondi, *J. Phys. Chem.* 1964, **68**, 441. The listed VDW radii are: Cd 1.58 Å, O 1.52 Å.
6. L.-A. Malmsten, *Acta Cryst.*, 1979, **B35**, 1702. The CCDC # is CDTXZO.
7. Mao, J.-G.; Wang, Z.; Clearfield, A. *Inorg. Chem.*, 2002, **41**, 3713.
